# Supplementary material
Source: publisher site journal article supplement (https://www.dovepress.com/article/408921)
Supplement: Supplementary file 1 [file get_supplementary_file.php]

---

## Supplemental materials

### Development of an Effective Neutralizing Antibody Assay for SARS-CoV-2 Diagnosis

Zhigang Liu <sup>1</sup>

Jiahui Liang <sup>1</sup>

Hangzhan Hu <sup>1</sup>

Mengli Wu <sup>1</sup>

Jingjing Ma <sup>1</sup>

Ziwei Ma <sup>1</sup>

Jianing Ji <sup>1</sup>

Hengyi Chen <sup>2</sup>

Xiaoquan Li <sup>1</sup>

Zhizeng Wang <sup>2,1\*</sup>

Yang Luo <sup>2,3\*</sup>

<sup>1</sup>Joint National Laboratory for Antibody Drug Engineering, Clinical Laboratory of the First Affiliated Hospital, School of Medicine, Henan University, Kaifeng 475004, China; <sup>2</sup>Center of Smart Laboratory and Molecular Medicine, Jiangjin Hospital, School of Medicine, Chongqing University, Chongqing 400044, China; <sup>3</sup>College of Life Science and Laboratory Medicine, Kunming Medical University, Kunming 650500, China.

Zhigang Liu, Jiahui Liang, Hangzhan Hu and Mengli Wu contributed equally to this work.

Correspondence: Zhizeng Wang and Yang Luo

Joint National Laboratory for Antibody Drug Engineering, Clinical Laboratory of the First Affiliated Hospital, School of Medicine, Henan University, Kaifeng 475004, China; Center of Smart Laboratory and Molecular Medicine, Jiangjin Hospital, School of Medicine, Chongqing University, Chongqing 400044, China.

Tel: +86 15093628687; +86 13594088001;

E-mail: wzhzeng@126.com; luoy@cqu.edu.cn

---

## Contents

---

| No. | Project name                                                                                                        | Page |
|-----|---------------------------------------------------------------------------------------------------------------------|------|
| 1   | Full image of colloidal gold for Figure 2B                                                                          | 3    |
| 2   | Selection of colloidal gold concentration                                                                           | 4    |
| 3   | Full image of conjugating pH selection for Figure 3B                                                                | 5    |
| 4   | Full image of ACE2 conjugating concentration of colloidal gold for Figure 3D and Figure 3E                          | 6    |
| 5   | Selection of BSA concentration for blocking reagents                                                                | 7    |
| 6   | Full image of coating concentration of RBD in test line selection for Figure 3G, Figure 3H, Figure 3I and Figure 3J | 8    |
| 7   | Limit of detection of lateral flow kit for NAb of SARS-CoV-2                                                        | 9    |
| 8   | Full image of specificity detection of lateral flow kit                                                             | 10   |
| 9   | Stability detection of lateral flow kit for NAb of SARS-CoV-2                                                       | 11   |
| 10  | Basic information and detection results of contributors for Figure 5, Table 1                                       | 13   |
| 11  | Basic information and detection results of contributors for Table 2                                                 | 51   |

---

---

## 1. Full image of colloidal gold for Figure 2B

Colloidal gold is rose-red, and the supernatant of colloidal gold is clear and translucent after 10000 rpm×10 min; and the colloidal gold after centrifugation can be fully resuspended. In addition, both before and after centrifugation, a red laser can pass through the colloidal gold solution, indicating that the colloidal gold has a good Tyndall effect. The full image is shown in Figure 1 for Figure 2B in manuscript.

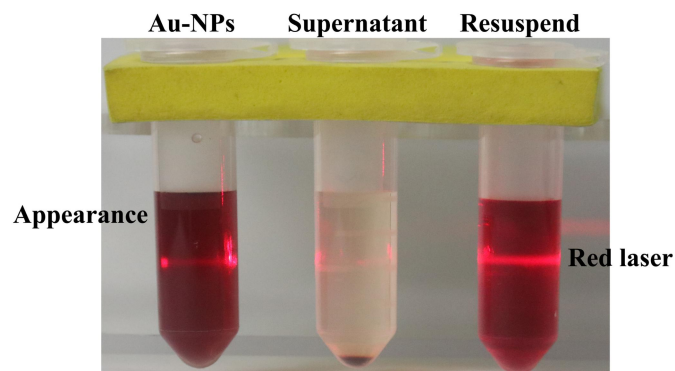

**Figure 1 Appearance of colloidal gold before and after centrifugation.**

**Au-NPs: colloidal gold nanoparticles.**

---

## 2. Selection of colloidal gold concentration

Initially, 0.25 mM colloidal gold was used for kit preparation, and although it successfully labeled ACE2 protein, the color development of even the control band C line was relatively weak (Figure 2). Finally 1.00 mM colloidal gold was selected for the preparation of the kit according to color rendering of the T line and C line.

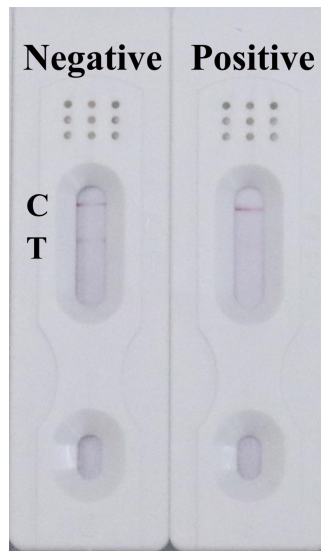

**Figure 2** Detection result of this assay kit by 0.25 mM colloidal gold.  
C: control line; T: test line.

---

### 3. Full image of conjugating pH selection for Figure 3B

pH is an important condition affecting the conjugating effect of protein and colloidal gold. Colloidal gold is conjugated to recombinant protein ACE2 by non-covalent bonds, and four different pH (6.0, 6.5, 7.0 and 8.0) are experimentally compared on the basis of the results of the color reaction, we found that color rendering works best when the pH is 6.5 by detecting negative sample (Figure 3), and the full image is shown in Figure 2 for Figure 3B in manuscript.

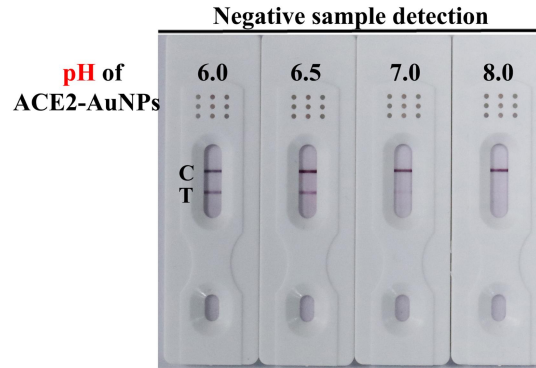

**Figure 3 Full image of pH selection.**  
**Au-NPs: colloidal gold nanoparticles; ACE2: angiotensin converting enzyme 2;**  
**C: control line; T: test lin.**

#### 4. Full image of ACE2 conjugating concentration of colloidal gold for Figure 3D and Figure 3E

The labeling concentration of ACE2 affects the stability of the conjugated complex and limit of detection of lateral flow kit. Two different concentration (6  $\mu\text{g/mL}$ , Figure 4A and 8 $\mu\text{g/mL}$ , Figure 4B) are experimentally compared based on the results of the color reaction, we found that the immune response elicited by the 6  $\mu\text{g/mL}$  was more effective. The full image is shown in figure 4 for Figure 3 D and Figure 3E in manuscript.

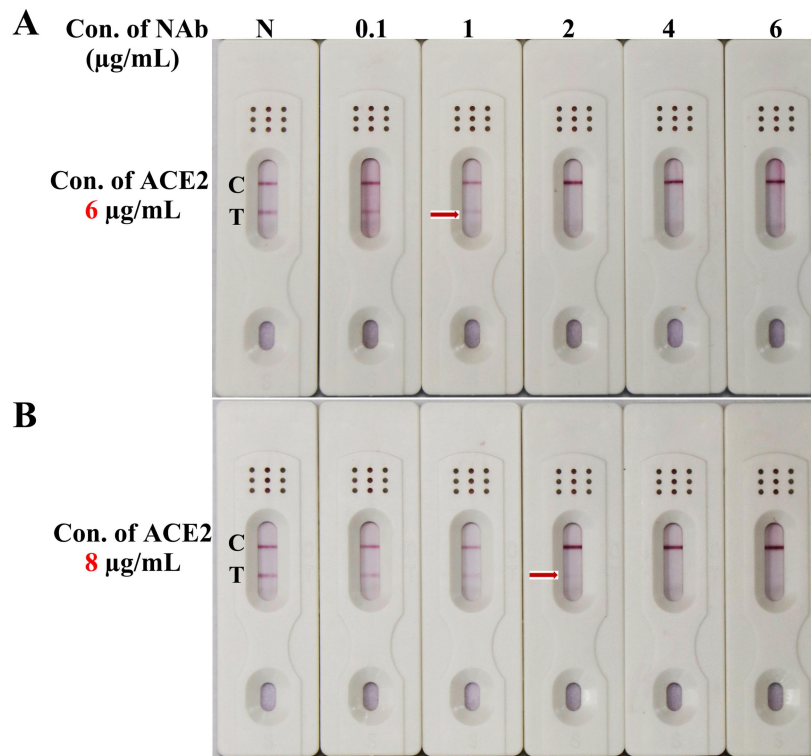

**Figure 4 Full image of ACE2 conjugating concentration of colloidal gold.**  
Con.: concentration; NAb: neutralizing antibody; ACE2: angiotensin converting enzyme 2;  
N: negative; C: control line; T: test line; Red arrow: Indicates a colour result.

## 5. Selection of BSA concentration for blocking reagents

The effectiveness of BSA with a final concentration of 1% and 2% as a blocking reagent was compared, the results show that when the BSA concentration is 2%, the LOD of this kit and the effect is better than 1% BSA (Figure 5A, 5B). Therefore, a 2% BSA concentration was selected in the following study.

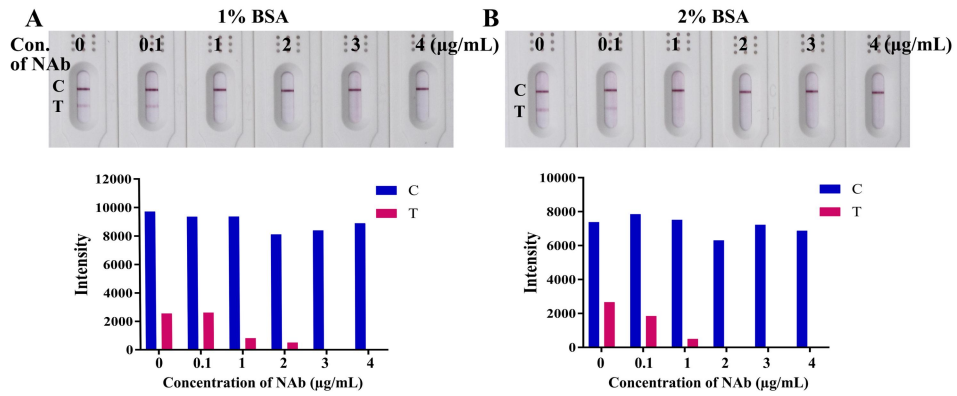

**Figure 5** Detection results of this kit with different BSA concentration.  
Con.: concentration; C: control line; T: test line.

## 6. Full image of coating concentration of RBD in test line selection for Figure 3G, Figure 3H, Figure 3I and Figure 3J

The coating concentration of test line has a significant regulatory effect on the limit of detection of the lateral flow kit. Four different concentrations of RBD (0.4 mg/mL Figure 6A, 0.2 mg/mL Figure 6B, 0.08 mg/mL Figure 6C and 0.04 mg/mL Figure 6D) are experimentally compared based on the above pH and concentration of ACE2-AuNPs, the condition of 0.08 mg/mL is optimal by comparing the detection effect of different concentrations of neutralizing antibody. The full image is shown in Figure 4 for Figure 3G, Figure 3H, Figure 3I and Figure 3J in manuscript.

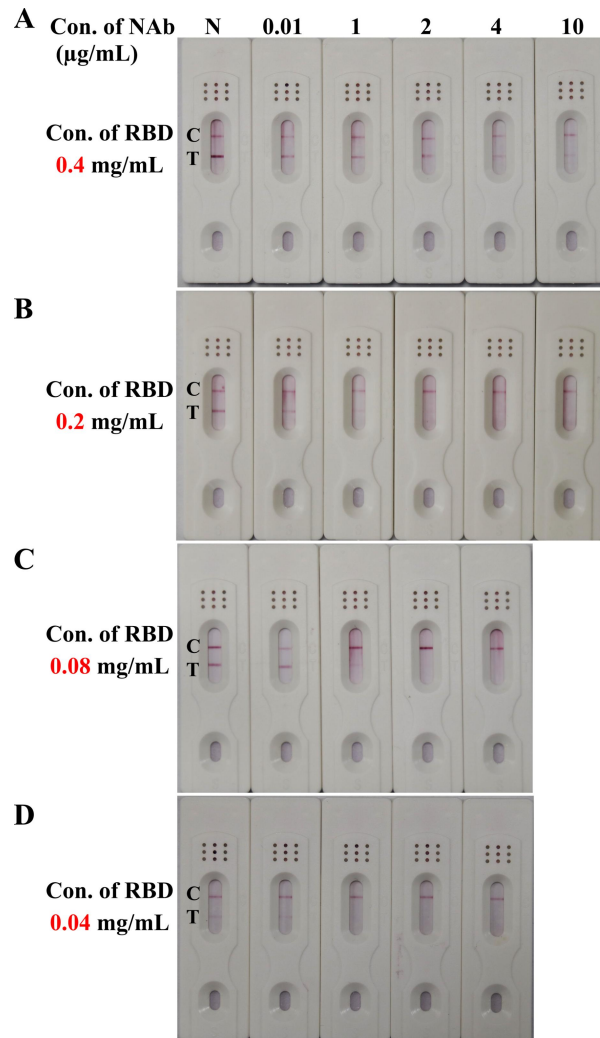

**Figure 6 Full image of coating concentration of RBD in test line selection.**  
Con.: concentration; NAb: neutralizing antibody; RBD: receptor binding domain; N: negative; C: control line; T: test line.



## 7. Limit of detection of lateral flow kit for NAb of SARS-CoV-2

Anti-SARS-Cov-2 NAb (1 mg/mL) were diluted to different concentrations with negative serum and added to the kit for the LOD. Finally, the LOD of NAb in serum was determined to be 2 µg/mL by the naked eye and the full image was shown in Figure 7A for Figure 4A in manuscript.

Another NAb is extracted and purified from a patient, diluted to different concentrations for LOD detection. Finally, the LOD is still 2 µg/mL by the naked eye (Figure 7B) and GraphPad Prism (Figure 7C), and the  $R^2$  of fitted curve for NAb detection was 0.9698 (Figure 7C). These results indicate good stability in the LOD detection.

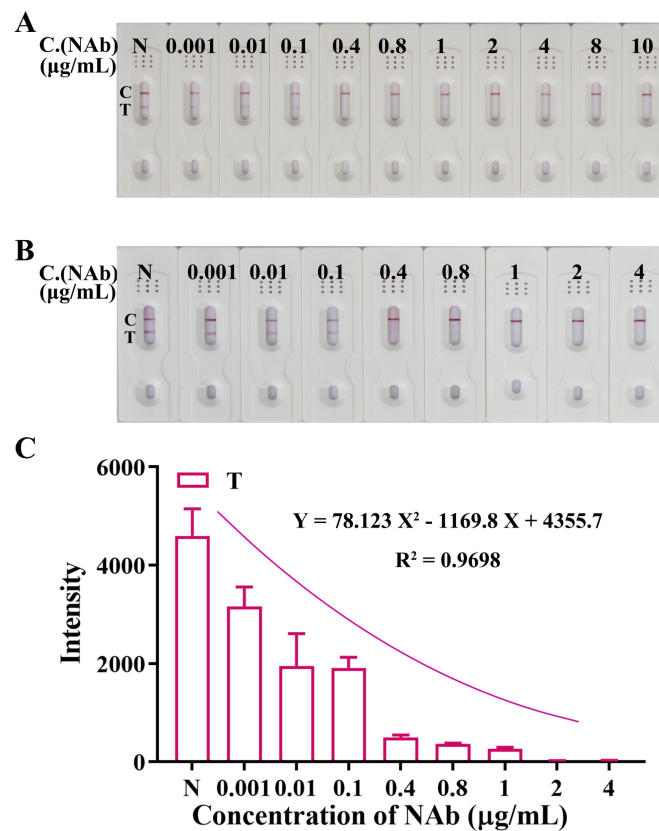

Figure 7 Limit of detection of the lateral flow kit used for different NAb detection in human serum. C.: concentration; NAb: neutralizing antibody; N: negative; C: control line; T: test line.

---

## 8. Full image of specificity detection of lateral flow kit

The experiment of kit-specificity was performed to avoid the cross-reaction of the kit with other proteins or antibody, generating in false-positive results. Full image was shown in Figure 8 for Figure 4B in manuscript.

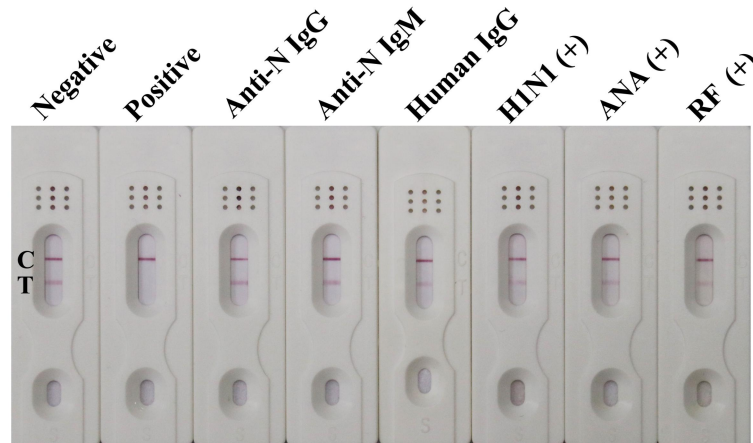

**Figure 8 The kit of specificity detection results.**

**C: control line; T: test line; Anti-N IgG: anti-nucleoprotein of SARS-CoV-2 immunoglobulin G; Anti-N IgM: anti-nucleoprotein of SARS-CoV-2 immunoglobulin M; H1N1: hemagglutinin 1 neuraminidase 1; ANA: antinuclear antibody; RF: rheumatoid factor; +: positive.**

---

## 9. Stability detection of lateral flow kit for NAb of SARS-CoV-2

After lateral flow kits were stored in a dry and dark environment at 37°C for 30 days, they were used for stability assays. Full image was shown in Figure 9 for Figure 4C in manuscript. In addition, LOD detection were also performed for kits stored at different time points (1 week, 2 week, 3 week and 4week), All analyses were completed within 15 minutes. The LODs of the lateral flow kits for NAb were 2 µg/mL (Figure 10), the same as the previous test results. No false positive results were found in any of the tests.

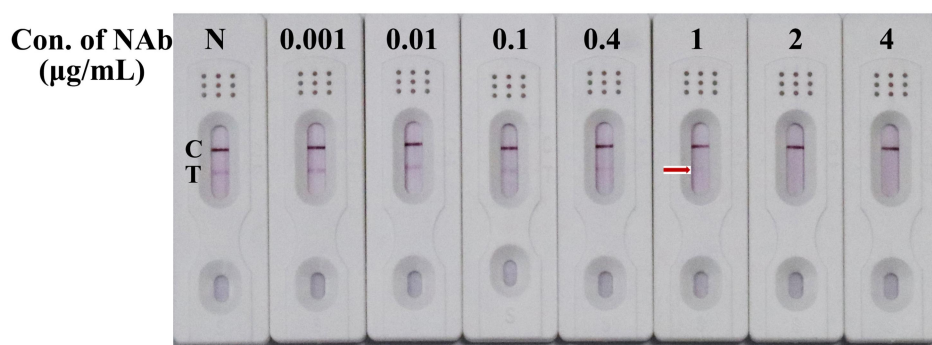

**Figure 9 Full image of stability detection of lateral flow kit.**  
**Con.:** concentration; **NAb:** neutralizing antibody; **N:** negative; **C:** control line; **T:** test line;  
**Red arrow:** Indicates a colour result.

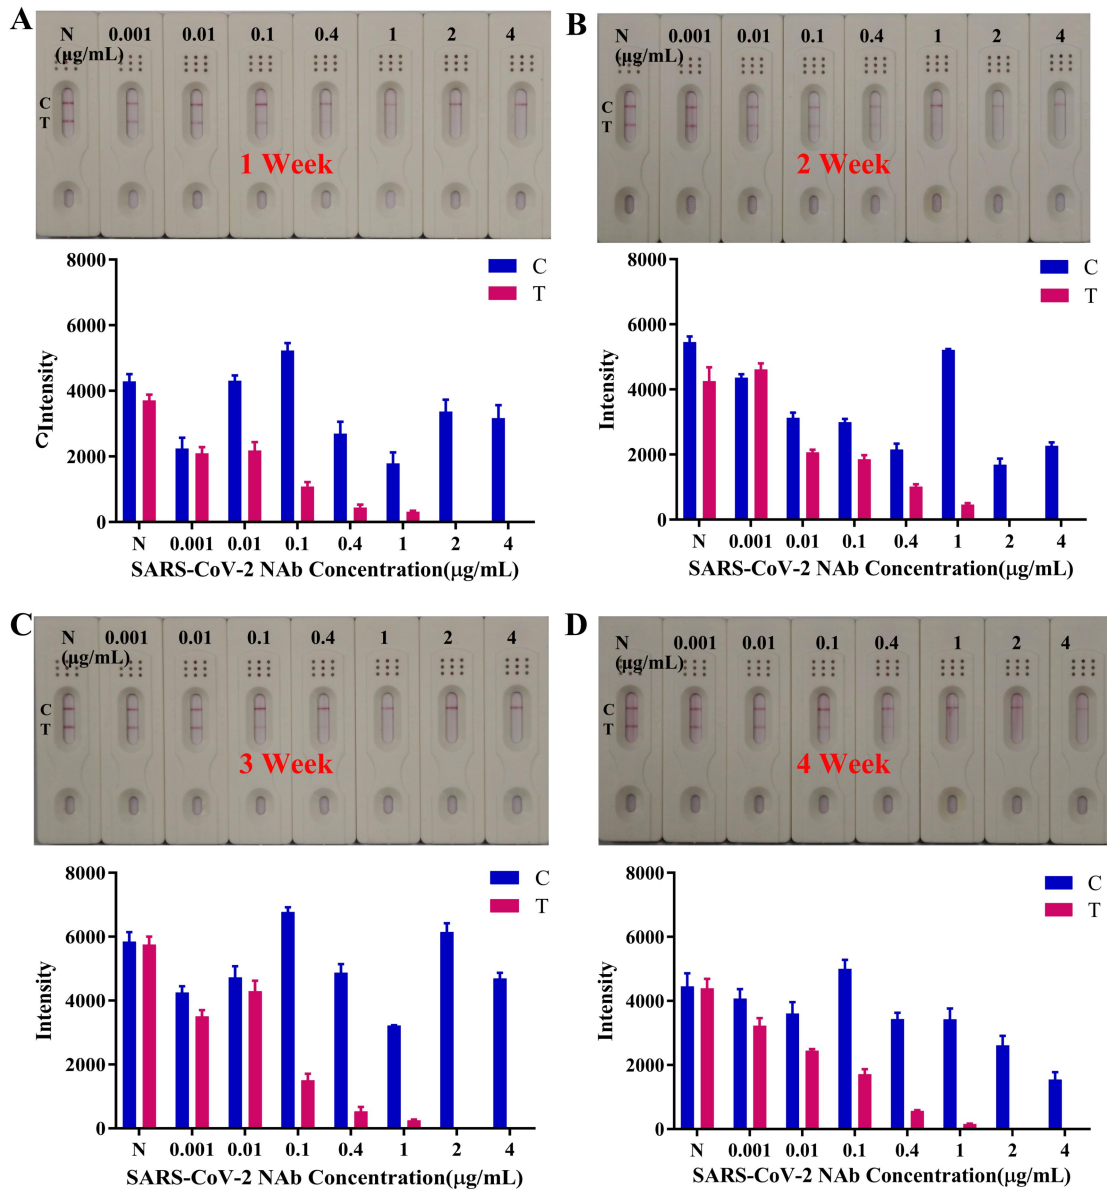

**Figure 10** Stability detection of the lateral flow kit at different points in time.  
 NAb: neutralizing antibody; N: negative; C: control line; T: test line.

---

## 10 Basic information and detection results of contributors for Figure 5 and Table 1

The clinical samples, which from the first affiliated hospital of Henan university and school of medicine of Henan university, were detected by ELISA or this research kit. A total of 684 specimens, including 311 pre-immunization samples, 170 samples 21 days after the first vaccination, 182 samples 21 days after the second vaccination for verification and 21 samples 6 months after the second vaccination. The basic information of all the contributors are shown in Table 2-Table 5.

### 10.1 Basic information and detection results of pre-immunization the contributors

The 311 samples included 5 cases under 20 years old, 173 cases between 20 and 39 years old and 133 cases between 40 and 59 years old. The basic information and detection results by ELISA or this kit of pre-immunization the contributors are shown in Table 1.

**Table 1 The basic information and detection results by ELISA or this kit of pre-immunization the contributors.**

| NO. | Sex    | Age | Inhibition rate by ELISA (%) | Detection results by this kit (+/-) | Notes |
|-----|--------|-----|------------------------------|-------------------------------------|-------|
| 1   | male   | 23  | 11.53%                       | -                                   |       |
| 2   | female | 21  | 12.45%                       | -                                   |       |
| 3   | male   | 39  |                              | -                                   |       |
| 4   | female | 32  |                              | -                                   |       |
| 5   | male   | 44  |                              | -                                   |       |
| 6   | male   | 42  |                              | -                                   |       |
| 7   | female | 31  |                              | -                                   |       |
| 8   | female | 25  | 8.79%                        | -                                   |       |
| 9   | female | 44  |                              | -                                   |       |
| 10  | female | 32  |                              | -                                   |       |
| 11  | male   | 51  |                              | -                                   |       |
| 12  | male   | 27  | 8.72%                        | -                                   |       |
| 13  | male   | 40  |                              | -                                   |       |
| 14  | female | 48  |                              | -                                   |       |
| 15  | male   | 42  |                              | -                                   |       |
| 16  | male   | 50  |                              | -                                   |       |

| <b>NO.</b> | <b>Sex</b> | <b>Age</b> | <b>Inhibition rate by ELISA (%)</b> | <b>Detection results by this kit (+/-)</b> | <b>Notes</b> |
|------------|------------|------------|-------------------------------------|--------------------------------------------|--------------|
| 17         | male       | 40         |                                     | -                                          |              |
| 18         | female     | 44         |                                     | -                                          |              |
| 19         | female     | 34         |                                     | -                                          |              |
| 20         | female     | 44         |                                     | -                                          |              |
| 21         | female     | 33         |                                     | -                                          |              |
| 22         | male       | 30         |                                     | -                                          |              |
| 23         | female     | 23         | 12.49%                              | -                                          |              |
| 24         | male       | 47         |                                     | -                                          |              |
| 25         | male       | 26         | 11.23%                              | -                                          |              |
| 26         | female     | 54         |                                     | -                                          |              |
| 27         | female     | 40         |                                     | -                                          |              |
| 28         | male       | 55         |                                     | -                                          |              |
| 29         | female     | 36         |                                     | -                                          |              |
| 30         | male       | 30         |                                     | -                                          |              |
| 31         | female     | 43         |                                     | -                                          |              |
| 32         | male       | 52         |                                     | -                                          |              |
| 33         | male       | 42         |                                     | -                                          |              |
| 34         | male       | 31         |                                     | -                                          |              |
| 35         | male       | 25         | 13.16%                              | -                                          |              |
| 36         | female     | 44         |                                     | -                                          |              |
| 37         | male       | 53         |                                     | -                                          |              |
| 38         | female     | 36         |                                     | -                                          |              |
| 39         | female     | 49         |                                     | -                                          |              |
| 40         | female     | 33         |                                     | -                                          |              |
| 41         | male       | 50         |                                     | -                                          |              |
| 42         | male       | 35         |                                     | -                                          |              |
| 43         | male       | 33         |                                     | -                                          |              |
| 44         | female     | 30         |                                     | -                                          |              |

| <b>NO.</b> | <b>Sex</b> | <b>Age</b> | <b>Inhibition rate by ELISA (%)</b> | <b>Detection results by this kit (+/-)</b> | <b>Notes</b> |
|------------|------------|------------|-------------------------------------|--------------------------------------------|--------------|
| 45         | female     | 45         |                                     | -                                          |              |
| 46         | female     | 44         |                                     | -                                          |              |
| 47         | female     | 32         |                                     | -                                          |              |
| 48         | male       | 37         |                                     | -                                          |              |
| 49         | male       | 47         |                                     | -                                          |              |
| 50         | male       | 27         | 6.05%                               | -                                          |              |
| 51         | male       | 54         |                                     | -                                          |              |
| 52         | male       | 42         |                                     | -                                          |              |
| 53         | male       | 31         |                                     | -                                          |              |
| 54         | female     | 25         | 9.97%                               | -                                          |              |
| 55         | male       | 44         |                                     | -                                          |              |
| 56         | male       | 53         |                                     | -                                          |              |
| 57         | male       | 36         |                                     | -                                          |              |
| 58         | female     | 49         |                                     | -                                          |              |
| 59         | female     | 41         |                                     | -                                          |              |
| 60         | female     | 50         |                                     | -                                          |              |
| 61         | female     | 35         |                                     | -                                          |              |
| 62         | male       | 42         |                                     | -                                          |              |
| 63         | male       | 47         |                                     | -                                          |              |
| 64         | male       | 32         |                                     | -                                          |              |
| 65         | male       | 53         |                                     | -                                          |              |
| 66         | female     | 26         | 10.33%                              | -                                          |              |
| 67         | male       | 48         |                                     | -                                          |              |
| 68         | female     | 38         |                                     | -                                          |              |
| 69         | female     | 31         |                                     | -                                          |              |
| 70         | female     | 33         |                                     | -                                          |              |
| 71         | male       | 37         |                                     | -                                          |              |
| 72         | male       | 31         |                                     | -                                          |              |

| <b>NO.</b> | <b>Sex</b> | <b>Age</b> | <b>Inhibition rate by ELISA (%)</b> | <b>Detection results by this kit (+/-)</b> | <b>Notes</b> |
|------------|------------|------------|-------------------------------------|--------------------------------------------|--------------|
| 73         | male       | 18         |                                     | -                                          |              |
| 74         | male       | 26         | 9.84%                               | -                                          |              |
| 75         | male       | 36         |                                     | -                                          |              |
| 76         | female     | 44         |                                     | -                                          |              |
| 77         | female     | 29         |                                     | -                                          |              |
| 78         | male       | 56         |                                     | -                                          |              |
| 79         | female     | 31         |                                     | -                                          |              |
| 80         | female     | 50         |                                     | -                                          |              |
| 81         | female     | 42         |                                     | -                                          |              |
| 82         | male       | 33         |                                     | -                                          |              |
| 83         | male       | 39         |                                     | -                                          |              |
| 84         | female     | 48         |                                     | -                                          |              |
| 85         | male       | 28         | 9.38%                               | -                                          |              |
| 86         | female     | 33         |                                     | -                                          |              |
| 87         | male       | 22         | 15.27%                              | -                                          |              |
| 88         | female     | 30         |                                     | -                                          |              |
| 89         | female     | 32         |                                     | -                                          |              |
| 90         | female     | 42         |                                     | -                                          |              |
| 91         | female     | 31         |                                     | -                                          |              |
| 92         | female     | 25         | 6.47%                               | -                                          |              |
| 93         | female     | 44         |                                     | -                                          |              |
| 94         | female     | 32         |                                     | -                                          |              |
| 95         | male       | 51         |                                     | -                                          |              |
| 96         | male       | 27         | 9.84%                               | -                                          |              |
| 97         | male       | 40         |                                     | -                                          |              |
| 98         | male       | 48         |                                     | -                                          |              |
| 99         | female     | 42         |                                     | -                                          |              |
| 100        | female     | 50         |                                     | -                                          |              |



| <b>NO.</b> | <b>Sex</b> | <b>Age</b> | <b>Inhibition rate by ELISA (%)</b> | <b>Detection results by this kit (+/-)</b> | <b>Notes</b> |
|------------|------------|------------|-------------------------------------|--------------------------------------------|--------------|
| 101        | male       | 40         |                                     | -                                          |              |
| 102        | female     | 44         |                                     | -                                          |              |
| 103        | female     | 34         |                                     | -                                          |              |
| 104        | male       | 44         |                                     | -                                          |              |
| 105        | female     | 33         |                                     | -                                          |              |
| 106        | male       | 30         |                                     | -                                          |              |
| 107        | male       | 23         | 11.76%                              | -                                          |              |
| 108        | male       | 33         |                                     | -                                          |              |
| 109        | male       | 37         |                                     | -                                          |              |
| 110        | female     | 37         |                                     | -                                          |              |
| 111        | male       | 35         |                                     | -                                          |              |
| 112        | female     | 29         |                                     | -                                          |              |
| 113        | female     | 28         | 9.23%                               | -                                          |              |
| 114        | female     | 34         |                                     | -                                          |              |
| 115        | male       | 44         |                                     | -                                          |              |
| 116        | male       | 21         | 16.17%                              | -                                          |              |
| 117        | male       | 29         |                                     | -                                          |              |
| 118        | female     | 46         |                                     | -                                          |              |
| 119        | female     | 32         |                                     | -                                          |              |
| 120        | female     | 49         |                                     | -                                          |              |
| 121        | female     | 46         |                                     | -                                          |              |
| 122        | male       | 35         |                                     | -                                          |              |
| 123        | male       | 27         | 8.20%                               | -                                          |              |
| 124        | male       | 27         | 8.09%                               | -                                          |              |
| 125        | male       | 40         |                                     | -                                          |              |
| 126        | male       | 48         |                                     | -                                          |              |
| 127        | male       | 42         |                                     | -                                          |              |
| 128        | male       | 50         |                                     | -                                          |              |

| <b>NO.</b> | <b>Sex</b> | <b>Age</b> | <b>Inhibition rate by ELISA (%)</b> | <b>Detection results by this kit (+/-)</b> | <b>Notes</b> |
|------------|------------|------------|-------------------------------------|--------------------------------------------|--------------|
| 129        | male       | 40         |                                     | -                                          |              |
| 130        | male       | 44         |                                     | -                                          |              |
| 131        | male       | 34         |                                     | -                                          |              |
| 132        | male       | 44         |                                     | -                                          |              |
| 133        | male       | 33         |                                     | -                                          |              |
| 134        | male       | 30         |                                     | -                                          |              |
| 135        | female     | 23         | 13.70%                              | -                                          |              |
| 136        | female     | 47         |                                     | -                                          |              |
| 137        | male       | 21         | 16.79%                              | -                                          |              |
| 138        | female     | 31         |                                     | -                                          |              |
| 139        | female     | 39         |                                     | -                                          |              |
| 140        | female     | 36         |                                     | -                                          |              |
| 141        | male       | 28         | 6.20%                               | -                                          |              |
| 142        | male       | 23         | 12.83%                              | -                                          |              |
| 143        | female     | 34         |                                     | -                                          |              |
| 144        | female     | 48         |                                     | -                                          |              |
| 145        | female     | 36         |                                     | -                                          |              |
| 146        | male       | 46         |                                     | -                                          |              |
| 147        | female     | 22         | 14.20%                              | -                                          |              |
| 148        | male       | 41         |                                     | -                                          |              |
| 149        | male       | 43         |                                     | -                                          |              |
| 150        | male       | 29         |                                     | -                                          |              |
| 151        | female     | 34         |                                     | -                                          |              |
| 152        | female     | 21         | 17.10%                              | -                                          |              |
| 153        | male       | 23         | 10.96%                              | -                                          |              |
| 154        | female     | 36         |                                     | -                                          |              |
| 155        | male       | 48         |                                     | -                                          |              |
| 156        | female     | 47         |                                     | -                                          |              |

| <b>NO.</b> | <b>Sex</b> | <b>Age</b> | <b>Inhibition rate by ELISA (%)</b> | <b>Detection results by this kit (+/-)</b> | <b>Notes</b> |
|------------|------------|------------|-------------------------------------|--------------------------------------------|--------------|
| 157        | female     | 46         |                                     | -                                          |              |
| 158        | female     | 22         | 13.21%                              | -                                          |              |
| 159        | female     | 21         | 14.00%                              | -                                          |              |
| 160        | female     | 39         |                                     | -                                          |              |
| 161        | female     | 32         |                                     | -                                          |              |
| 162        | female     | 44         |                                     | -                                          |              |
| 163        | male       | 42         |                                     | -                                          |              |
| 164        | male       | 31         |                                     | -                                          |              |
| 165        | male       | 25         | 8.71%                               | -                                          |              |
| 166        | male       | 44         |                                     | -                                          |              |
| 167        | female     | 32         |                                     | -                                          |              |
| 168        | female     | 51         |                                     | -                                          |              |
| 169        | male       | 27         | 10.24%                              | -                                          |              |
| 170        | female     | 40         |                                     | -                                          |              |
| 171        | female     | 48         |                                     | -                                          |              |
| 172        | male       | 42         |                                     | -                                          |              |
| 173        | male       | 50         |                                     | -                                          |              |
| 174        | male       | 40         |                                     | -                                          |              |
| 175        | female     | 44         |                                     | -                                          |              |
| 176        | male       | 34         |                                     | -                                          |              |
| 177        | male       | 44         |                                     | -                                          |              |
| 178        | female     | 33         |                                     | -                                          |              |
| 179        | female     | 50         |                                     | -                                          |              |
| 180        | male       | 40         |                                     | -                                          |              |
| 181        | female     | 44         |                                     | -                                          |              |
| 182        | male       | 34         |                                     | -                                          |              |
| 183        | male       | 44         |                                     | -                                          |              |
| 184        | female     | 33         |                                     | -                                          |              |

| <b>NO.</b> | <b>Sex</b> | <b>Age</b> | <b>Inhibition rate by ELISA (%)</b> | <b>Detection results by this kit (+/-)</b> | <b>Notes</b> |
|------------|------------|------------|-------------------------------------|--------------------------------------------|--------------|
| 185        | female     | 30         |                                     | -                                          |              |
| 186        | male       | 23         | 10.76%                              | -                                          |              |
| 187        | male       | 47         |                                     | -                                          |              |
| 188        | female     | 22         | 12.58%                              | -                                          |              |
| 189        | male       | 31         |                                     | -                                          |              |
| 190        | male       | 39         |                                     | -                                          |              |
| 191        | female     | 36         |                                     | -                                          |              |
| 192        | female     | 28         | 8.57%                               | -                                          |              |
| 193        | female     | 23         | 10.45%                              | -                                          |              |
| 194        | male       | 37         |                                     | -                                          |              |
| 195        | female     | 48         |                                     | -                                          |              |
| 196        | male       | 45         |                                     | -                                          |              |
| 197        | male       | 46         |                                     | -                                          |              |
| 198        | male       | 30         |                                     | -                                          |              |
| 199        | female     | 23         | 11.41%                              | -                                          |              |
| 200        | female     | 47         |                                     | -                                          |              |
| 201        | female     | 21         | 15.07%                              | -                                          |              |
| 202        | male       | 31         |                                     | -                                          |              |
| 203        | female     | 39         |                                     | -                                          |              |
| 204        | male       | 36         |                                     | -                                          |              |
| 205        | male       | 28         |                                     | -                                          |              |
| 206        | female     | 23         | 12.88%                              | -                                          |              |
| 207        | male       | 33         |                                     | -                                          |              |
| 208        | female     | 47         |                                     | -                                          |              |
| 209        | female     | 47         |                                     | -                                          |              |
| 210        | male       | 37         |                                     | -                                          |              |
| 211        | female     | 54         |                                     | -                                          |              |
| 212        | male       | 28         |                                     | -                                          |              |

| <b>NO.</b> | <b>Sex</b> | <b>Age</b> | <b>Inhibition rate by ELISA (%)</b> | <b>Detection results by this kit (+/-)</b> | <b>Notes</b> |
|------------|------------|------------|-------------------------------------|--------------------------------------------|--------------|
| 213        | female     | 40         |                                     | -                                          |              |
| 214        | male       | 33         |                                     | -                                          |              |
| 215        | male       | 42         |                                     | -                                          |              |
| 216        | female     | 35         |                                     | -                                          |              |
| 217        | female     | 54         |                                     | -                                          |              |
| 218        | female     | 38         |                                     | -                                          |              |
| 219        | female     | 48         |                                     | -                                          |              |
| 220        | male       | 28         |                                     | -                                          |              |
| 221        | female     | 44         |                                     | -                                          |              |
| 222        | female     | 33         |                                     | -                                          |              |
| 223        | male       | 38         |                                     | -                                          |              |
| 224        | male       | 36         |                                     | -                                          |              |
| 225        | female     | 19         |                                     | -                                          |              |
| 226        | male       | 32         |                                     | -                                          |              |
| 227        | male       | 46         |                                     | -                                          |              |
| 228        | female     | 29         |                                     | -                                          |              |
| 229        | male       | 36         |                                     | -                                          |              |
| 230        | male       | 38         |                                     | -                                          |              |
| 231        | male       | 49         |                                     | -                                          |              |
| 232        | male       | 51         |                                     | -                                          |              |
| 233        | female     | 30         |                                     | -                                          |              |
| 234        | female     | 55         |                                     | -                                          |              |
| 235        | male       | 45         |                                     | -                                          |              |
| 236        | male       | 24         | 10.09%                              | -                                          |              |
| 237        | male       | 22         | 13.62%                              | -                                          |              |
| 238        | female     | 35         |                                     | -                                          |              |
| 239        | female     | 36         |                                     | -                                          |              |
| 240        | male       | 46         |                                     | -                                          |              |

| <b>NO.</b> | <b>Sex</b> | <b>Age</b> | <b>Inhibition rate by ELISA (%)</b> | <b>Detection results by this kit (+/-)</b> | <b>Notes</b> |
|------------|------------|------------|-------------------------------------|--------------------------------------------|--------------|
| 241        | female     | 36         |                                     | -                                          |              |
| 242        | male       | 34         |                                     | -                                          |              |
| 243        | male       | 41         |                                     | -                                          |              |
| 244        | male       | 23         | 11.67%                              | -                                          |              |
| 245        | male       | 23         | 10.66%                              | -                                          |              |
| 246        | female     | 54         |                                     | -                                          |              |
| 247        | female     | 20         | 14.75%                              | -                                          |              |
| 248        | female     | 31         |                                     | -                                          |              |
| 249        | male       | 39         |                                     | -                                          |              |
| 250        | female     | 36         |                                     | -                                          |              |
| 251        | female     | 28         |                                     | -                                          |              |
| 252        | male       | 23         | 10.18%                              | -                                          |              |
| 253        | female     | 19         |                                     | -                                          |              |
| 254        | female     | 48         |                                     | -                                          |              |
| 255        | male       | 33         |                                     | -                                          |              |
| 256        | female     | 46         |                                     | -                                          |              |
| 257        | male       | 30         |                                     | -                                          |              |
| 258        | female     | 23         | 10.87%                              | -                                          |              |
| 259        | female     | 47         |                                     | -                                          |              |
| 260        | male       | 19         | 15.81%                              | -                                          |              |
| 261        | female     | 31         |                                     | -                                          |              |
| 262        | female     | 39         |                                     | -                                          |              |
| 263        | female     | 36         |                                     | -                                          |              |
| 264        | male       | 28         |                                     | -                                          |              |
| 265        | male       | 23         | 9.48%                               | -                                          |              |
| 266        | male       | 42         |                                     | -                                          |              |
| 267        | female     | 47         |                                     | -                                          |              |
| 268        | female     | 33         |                                     | -                                          |              |

| <b>NO.</b> | <b>Sex</b> | <b>Age</b> | <b>Inhibition rate<br/>by ELISA (%)</b> | <b>Detection results<br/>by this kit (+/-)</b> | <b>Notes</b> |
|------------|------------|------------|-----------------------------------------|------------------------------------------------|--------------|
| 269        | male       | 37         |                                         | -                                              |              |
| 270        | female     | 54         |                                         | -                                              |              |
| 271        | female     | 28         |                                         | -                                              |              |
| 272        | male       | 44         |                                         | -                                              |              |
| 273        | male       | 39         |                                         | -                                              |              |
| 274        | female     | 36         |                                         | -                                              |              |
| 275        | female     | 28         |                                         | -                                              |              |
| 276        | female     | 23         | 8.63%                                   | -                                              |              |
| 277        | female     | 17         |                                         | -                                              |              |
| 278        | female     | 48         |                                         | -                                              |              |
| 279        | female     | 41         |                                         | -                                              |              |
| 280        | male       | 46         |                                         | -                                              |              |
| 281        | female     | 22         | 10.59%                                  | -                                              |              |
| 282        | female     | 42         |                                         | -                                              |              |
| 283        | male       | 47         |                                         | -                                              |              |
| 284        | female     | 36         |                                         | -                                              |              |
| 285        | female     | 36         |                                         | -                                              |              |
| 286        | male       | 21         | 13.92%                                  | -                                              |              |
| 287        | male       | 23         | 11.63%                                  | -                                              |              |
| 288        | female     | 46         |                                         | -                                              |              |
| 289        | female     | 48         |                                         | -                                              |              |
| 290        | female     | 42         |                                         | -                                              |              |
| 291        | female     | 46         |                                         | -                                              |              |
| 292        | female     | 22         | 11.76%                                  | -                                              |              |
| 293        | female     | 21         | 13.62%                                  | -                                              |              |
| 294        | male       | 39         |                                         | -                                              |              |
| 295        | female     | 32         |                                         | -                                              |              |
| 296        | male       | 44         |                                         | -                                              |              |

| <b>NO.</b> | <b>Sex</b> | <b>Age</b> | <b>Inhibition rate<br/>by ELISA (%)</b> | <b>Detection results<br/>by this kit (+/-)</b> | <b>Notes</b> |
|------------|------------|------------|-----------------------------------------|------------------------------------------------|--------------|
| 297        | male       | 42         |                                         | -                                              |              |
| 298        | male       | 31         |                                         | -                                              |              |
| 299        | female     | 25         | 11.96%                                  | -                                              |              |
| 300        | female     | 44         |                                         | -                                              |              |
| 301        | female     | 32         |                                         | -                                              |              |
| 302        | male       | 51         |                                         | -                                              |              |
| 303        | male       | 27         | 9.26%                                   | -                                              |              |
| 304        | male       | 40         |                                         | -                                              |              |
| 305        | female     | 48         |                                         | -                                              |              |
| 306        | male       | 42         |                                         | -                                              |              |
| 307        | female     | 50         |                                         | -                                              |              |
| 308        | male       | 40         |                                         | -                                              |              |
| 309        | female     | 44         |                                         | -                                              |              |
| 310        | male       | 34         |                                         | -                                              |              |
| 311        | male       | 44         |                                         | -                                              |              |



---

## 10.2 Basic information and detection results of first vaccination the contributors

The 170 samples included 6 cases under 20 years old, 108 cases between 20 and 39 years old, 56 cases between 40 and 59 years old. The basic information and detection results by ELISA or this kit of first vaccination contributors are shown in Table 2.

**Table 2 The basic information and detection results by ELISA or this kit of first vaccination the contributors.**

| NO. | Sex    | Age | ELISA inhibition rate (%) | Test results of reagent kit (+/-) | Notes |
|-----|--------|-----|---------------------------|-----------------------------------|-------|
| 1   | female | 22  | 16.37%                    | -                                 |       |
| 3   | male   | 39  |                           | -                                 |       |
| 4   | female | 36  |                           | -                                 |       |
| 5   | male   | 28  |                           | -                                 |       |
| 6   | female | 23  | 13.30%                    | -                                 |       |
| 7   | male   | 37  |                           | -                                 |       |
| 8   | male   | 48  |                           | -                                 |       |
| 9   | male   | 45  |                           | -                                 |       |
| 10  | male   | 46  |                           | -                                 |       |
| 11  | female | 30  |                           | -                                 |       |
| 12  | male   | 23  | 13.07%                    | -                                 |       |
| 13  | female | 47  |                           | -                                 |       |
| 14  | female | 21  | 13.61%                    | -                                 |       |
| 15  | female | 31  |                           | -                                 |       |
| 16  | male   | 39  |                           | -                                 |       |
| 17  | male   | 36  |                           | -                                 |       |
| 18  | male   | 28  |                           | -                                 |       |
| 19  | female | 23  | 11.24%                    | -                                 |       |
| 20  | female | 33  |                           | -                                 |       |
| 21  | female | 47  |                           | -                                 |       |
| 22  | female | 47  |                           | -                                 |       |
| 23  | male   | 37  |                           | -                                 |       |

| NO. | Sex    | Age | ELISA inhibition rate (%) | Test results of reagent kit (+/-) | Notes |
|-----|--------|-----|---------------------------|-----------------------------------|-------|
| 24  | male   | 54  |                           | -                                 |       |
| 25  | male   | 28  |                           | -                                 |       |
| 26  | male   | 40  |                           | -                                 |       |
| 27  | male   | 33  |                           | -                                 |       |
| 28  | male   | 42  |                           | -                                 |       |
| 29  | female | 35  |                           | -                                 |       |
| 30  | male   | 54  |                           | -                                 |       |
| 31  | male   | 38  |                           | -                                 |       |
| 32  | male   | 48  |                           | -                                 |       |
| 33  | female | 28  |                           | +                                 |       |
| 34  | female | 44  |                           | -                                 |       |
| 35  | female | 33  |                           | -                                 |       |
| 36  | female | 38  |                           | -                                 |       |
| 37  | male   | 36  |                           | -                                 |       |
| 38  | male   | 19  | 11.04%                    | -                                 |       |
| 39  | male   | 32  |                           | -                                 |       |
| 40  | male   | 46  |                           | -                                 |       |
| 41  | female | 29  |                           | -                                 |       |
| 42  | male   | 36  |                           | -                                 |       |
| 43  | female | 38  |                           | -                                 |       |
| 44  | female | 49  |                           | -                                 |       |
| 45  | female | 51  |                           | -                                 |       |
| 46  | male   | 30  |                           | -                                 |       |
| 47  | male   | 55  |                           | -                                 |       |
| 48  | male   | 45  |                           | -                                 |       |
| 49  | male   | 24  |                           | -                                 |       |
| 50  | male   | 22  | 15.26%                    | -                                 |       |
| 51  | female | 35  |                           | -                                 |       |

| NO. | Sex    | Age | ELISA inhibition rate (%) | Test results of reagent kit (+/-) | Notes |
|-----|--------|-----|---------------------------|-----------------------------------|-------|
| 52  | female | 36  |                           | -                                 |       |
| 53  | male   | 46  |                           | -                                 |       |
| 54  | female | 36  |                           | -                                 |       |
| 55  | female | 34  |                           | -                                 |       |
| 56  | female | 41  |                           | -                                 |       |
| 57  | male   | 23  | 14.42%                    | -                                 |       |
| 58  | male   | 23  | 15.83%                    | -                                 |       |
| 59  | female | 54  |                           | -                                 |       |
| 60  | male   | 20  | 9.74%                     | -                                 |       |
| 61  | female | 31  |                           | -                                 |       |
| 62  | male   | 39  |                           | -                                 |       |
| 63  | female | 36  |                           | -                                 |       |
| 64  | female | 28  |                           | -                                 |       |
| 65  | female | 23  |                           | -                                 |       |
| 66  | female | 19  | 13.52%                    | -                                 |       |
| 67  | female | 48  |                           | -                                 |       |
| 68  | female | 36  |                           | -                                 |       |
| 69  | female | 38  |                           | -                                 |       |
| 70  | male   | 49  |                           | -                                 |       |
| 71  | male   | 51  |                           | -                                 |       |
| 72  | male   | 30  |                           | -                                 |       |
| 73  | male   | 55  |                           | -                                 |       |
| 74  | female | 45  |                           | -                                 |       |
| 75  | female | 24  |                           | -                                 |       |
| 76  | male   | 22  | 16.90%                    | -                                 |       |
| 77  | female | 35  |                           | -                                 |       |
| 78  | female | 36  |                           | -                                 |       |
| 79  | male   | 46  |                           | -                                 |       |

| NO. | Sex    | Age | ELISA inhibition rate (%) | Test results of reagent kit (+/-) | Notes |
|-----|--------|-----|---------------------------|-----------------------------------|-------|
| 80  | female | 36  |                           | -                                 |       |
| 81  | male   | 34  |                           | -                                 |       |
| 82  | male   | 41  |                           | -                                 |       |
| 83  | male   | 23  |                           | -                                 |       |
| 84  | male   | 23  |                           | -                                 |       |
| 85  | female | 54  |                           | -                                 |       |
| 86  | male   | 20  | 10.52%                    | -                                 |       |
| 87  | female | 31  |                           | -                                 |       |
| 88  | female | 39  |                           | -                                 |       |
| 89  | female | 36  |                           | -                                 |       |
| 90  | male   | 28  |                           | -                                 |       |
| 91  | male   | 23  |                           | -                                 |       |
| 92  | male   | 19  | 7.70%                     | -                                 |       |
| 93  | female | 48  |                           | -                                 |       |
| 94  | female | 33  |                           | -                                 |       |
| 95  | female | 46  |                           | -                                 |       |
| 96  | female | 30  |                           | -                                 |       |
| 97  | male   | 23  |                           | -                                 |       |
| 98  | male   | 47  |                           | -                                 |       |
| 99  | male   | 19  | 9.47%                     | -                                 |       |
| 100 | male   | 31  |                           | -                                 |       |
| 101 | male   | 39  |                           | -                                 |       |
| 102 | male   | 36  |                           | -                                 |       |
| 103 | male   | 28  |                           | -                                 |       |
| 104 | male   | 23  |                           | -                                 |       |
| 105 | male   | 42  |                           | -                                 |       |
| 106 | male   | 47  |                           | -                                 |       |
| 107 | male   | 33  |                           | -                                 |       |

| NO. | Sex    | Age | ELISA inhibition rate (%) | Test results of reagent kit (+/-) | Notes |
|-----|--------|-----|---------------------------|-----------------------------------|-------|
| 108 | male   | 37  |                           | -                                 |       |
| 109 | male   | 54  |                           | -                                 |       |
| 110 | female | 28  |                           | -                                 |       |
| 111 | female | 44  |                           | -                                 |       |
| 112 | male   | 39  |                           | -                                 |       |
| 113 | female | 36  |                           | -                                 |       |
| 114 | female | 28  |                           | -                                 |       |
| 115 | female | 23  |                           | -                                 |       |
| 116 | male   | 17  | 17.69%                    | -                                 |       |
| 117 | male   | 48  |                           | -                                 |       |
| 118 | female | 41  |                           | -                                 |       |
| 119 | female | 46  |                           | -                                 |       |
| 120 | female | 22  | 20.37%                    | -                                 |       |
| 121 | male   | 33  |                           | -                                 |       |
| 122 | female | 30  |                           | -                                 |       |
| 123 | male   | 23  |                           | -                                 |       |
| 124 | male   | 47  |                           | -                                 |       |
| 125 | male   | 22  | 13.49%                    | -                                 |       |
| 126 | female | 31  |                           | -                                 |       |
| 127 | female | 39  |                           | -                                 |       |
| 128 | male   | 36  |                           | -                                 |       |
| 129 | female | 28  |                           | -                                 |       |
| 130 | male   | 23  |                           | -                                 |       |
| 131 | female | 37  |                           | -                                 |       |
| 132 | female | 48  |                           | -                                 |       |
| 133 | female | 45  |                           | -                                 |       |
| 134 | female | 46  |                           | -                                 |       |
| 135 | female | 30  |                           | -                                 |       |

| <b>NO.</b> | <b>Sex</b> | <b>Age</b> | <b>ELISA inhibition rate (%)</b> | <b>Test results of reagent kit (+/-)</b> | <b>Notes</b> |
|------------|------------|------------|----------------------------------|------------------------------------------|--------------|
| 136        | female     | 23         |                                  | -                                        |              |
| 137        | female     | 47         |                                  | -                                        |              |
| 138        | male       | 21         | 13.52%                           | -                                        |              |
| 139        | male       | 31         |                                  | -                                        |              |
| 140        | male       | 39         |                                  | -                                        |              |
| 141        | male       | 36         |                                  | -                                        |              |
| 142        | female     | 28         |                                  | -                                        |              |
| 143        | female     | 23         |                                  | -                                        |              |
| 144        | male       | 33         |                                  | -                                        |              |
| 145        | female     | 47         |                                  | -                                        |              |
| 146        | female     | 47         |                                  | -                                        |              |
| 147        | male       | 37         |                                  | -                                        |              |
| 148        | male       | 54         |                                  | -                                        |              |
| 149        | male       | 28         |                                  | -                                        |              |
| 150        | female     | 40         |                                  | -                                        |              |
| 151        | male       | 33         |                                  | -                                        |              |
| 152        | male       | 42         |                                  | -                                        |              |
| 153        | female     | 35         |                                  | -                                        |              |
| 154        | female     | 54         |                                  | -                                        |              |
| 155        | male       | 54         |                                  | -                                        |              |
| 156        | female     | 28         |                                  | -                                        |              |
| 157        | male       | 40         |                                  | -                                        |              |
| 158        | male       | 33         |                                  | -                                        |              |
| 159        | female     | 42         |                                  | -                                        |              |
| 160        | female     | 35         |                                  | -                                        |              |
| 161        | male       | 54         |                                  | -                                        |              |
| 162        | male       | 38         |                                  | -                                        |              |
| 163        | female     | 48         |                                  | -                                        |              |

---

| <b>NO.</b> | <b>Sex</b> | <b>Age</b> | <b>ELISA inhibition rate (%)</b> | <b>Test results of reagent kit (+/-)</b> | <b>Notes</b> |
|------------|------------|------------|----------------------------------|------------------------------------------|--------------|
| 164        | male       | 28         |                                  | -                                        |              |
| 165        | male       | 44         |                                  | -                                        |              |
| 166        | female     | 33         |                                  | -                                        |              |
| 167        | female     | 38         |                                  | -                                        |              |
| 168        | female     | 36         |                                  | +                                        |              |
| 169        | male       | 19         | 6.67%                            | -                                        |              |
| 170        | female     | 32         |                                  | -                                        |              |

### 10.3 Basic information and detection results of second vaccination the contributors

The 182 samples included 5 cases under 20 years old, 125 cases between 20 and 39 years old and 52 cases between 40 and 59 years old. The basic information and detection results by ELISA or this kit of second vaccination contributors are shown in Table 3.

**Table 3 The basic information and detection results by ELISA or this kit of pre-immunization the contributors.**

| NO. | Sex    | Age | ELISA inhibition rate (%) | Test results of reagent kit (+/-) | Notes |
|-----|--------|-----|---------------------------|-----------------------------------|-------|
| 1   | male   | 47  |                           | +                                 |       |
| 2   | female | 21  |                           | +                                 |       |
| 3   | female | 31  | 57.58%                    | +                                 |       |
| 4   | female | 39  |                           | +                                 |       |
| 5   | female | 36  | 51.92%                    | +                                 |       |
| 6   | male   | 28  |                           | +                                 |       |
| 7   | male   | 23  | 83.77%                    | +                                 |       |
| 8   | male   | 33  | 42.32%                    | +                                 |       |
| 9   | female | 47  |                           | +                                 |       |
| 10  | male   | 47  |                           | +                                 |       |
| 11  | male   | 37  |                           | +                                 |       |
| 12  | male   | 54  |                           | +                                 |       |
| 13  | female | 28  |                           | +                                 |       |
| 14  | female | 40  |                           | +                                 |       |
| 15  | female | 33  | 43.73%                    | +                                 |       |
| 16  | female | 42  |                           | +                                 |       |
| 17  | male   | 35  | 89.67%                    | +                                 |       |
| 18  | female | 54  |                           | +                                 |       |
| 19  | male   | 38  |                           | +                                 |       |
| 20  | male   | 48  |                           | +                                 |       |
| 21  | female | 28  |                           | +                                 |       |
| 22  | female | 44  |                           | +                                 |       |



| <b>NO.</b> | <b>Sex</b> | <b>Age</b> | <b>ELISA inhibition rate (%)</b> | <b>Test results of reagent kit (+/-)</b> | <b>Notes</b> |
|------------|------------|------------|----------------------------------|------------------------------------------|--------------|
| 23         | male       | 33         | 80.48%                           | +                                        |              |
| 24         | female     | 38         |                                  | +                                        |              |
| 25         | male       | 36         |                                  | +                                        |              |
| 26         | female     | 19         | 85.52%                           | +                                        |              |
| 27         | male       | 32         | 70.56%                           | +                                        |              |
| 28         | male       | 46         |                                  | +                                        |              |
| 29         | male       | 29         | 76.51%                           | -                                        |              |
| 30         | male       | 36         |                                  | +                                        |              |
| 31         | female     | 38         |                                  | +                                        |              |
| 32         | male       | 49         |                                  | +                                        |              |
| 33         | female     | 51         |                                  | +                                        |              |
| 34         | female     | 30         | 63.52%                           | +                                        |              |
| 35         | female     | 55         |                                  | +                                        |              |
| 36         | male       | 45         |                                  | +                                        |              |
| 37         | male       | 24         | 70.94%                           | +                                        |              |
| 38         | male       | 22         | 78.29%                           | -                                        |              |
| 39         | female     | 35         | 47.38%                           | +                                        |              |
| 40         | female     | 36         |                                  | +                                        |              |
| 41         | female     | 46         |                                  | +                                        |              |
| 42         | female     | 36         |                                  | +                                        |              |
| 43         | male       | 34         | 47.49%                           | +                                        |              |
| 44         | male       | 41         |                                  | +                                        |              |
| 45         | male       | 23         | 94.14%                           | +                                        |              |
| 46         | male       | 23         | 75.95%                           | +                                        |              |
| 47         | male       | 54         |                                  | +                                        |              |
| 48         | male       | 20         | 78.34%                           | +                                        |              |
| 49         | female     | 31         | 83.58%                           | +                                        |              |
| 50         | male       | 39         |                                  | +                                        |              |

| NO. | Sex    | Age | ELISA inhibition rate (%) | Test results of reagent kit (+/-) | Notes |
|-----|--------|-----|---------------------------|-----------------------------------|-------|
| 51  | male   | 36  |                           | +                                 |       |
| 52  | male   | 28  |                           | +                                 |       |
| 53  | female | 23  | 85.66%                    | +                                 |       |
| 54  | female | 23  | 82.11%                    | +                                 |       |
| 55  | female | 36  |                           | +                                 |       |
| 56  | female | 48  |                           | +                                 |       |
| 57  | male   | 47  |                           | +                                 |       |
| 58  | male   | 46  |                           | +                                 |       |
| 59  | male   | 22  | 72.06%                    | +                                 |       |
| 60  | male   | 21  |                           | +                                 |       |
| 61  | female | 39  |                           | +                                 |       |
| 62  | male   | 32  | 58.67%                    | +                                 |       |
| 63  | female | 44  |                           | +                                 |       |
| 64  | female | 42  |                           | +                                 |       |
| 65  | female | 31  | 70.82%                    | +                                 |       |
| 66  | male   | 25  | 74.57%                    | +                                 |       |
| 67  | male   | 44  |                           | +                                 |       |
| 68  | male   | 32  | 64.53%                    | +                                 |       |
| 69  | male   | 51  |                           | +                                 |       |
| 70  | male   | 27  | 67.60%                    | +                                 |       |
| 71  | female | 40  |                           | +                                 |       |
| 72  | female | 48  |                           | +                                 |       |
| 73  | male   | 42  |                           | +                                 |       |
| 74  | female | 50  |                           | +                                 |       |
| 75  | female | 40  |                           | +                                 |       |
| 76  | female | 44  |                           | +                                 |       |
| 77  | male   | 34  | 57.99%                    | +                                 |       |
| 78  | male   | 44  |                           | +                                 |       |

| <b>NO.</b> | <b>Sex</b> | <b>Age</b> | <b>ELISA inhibition rate (%)</b> | <b>Test results of reagent kit (+/-)</b> | <b>Notes</b> |
|------------|------------|------------|----------------------------------|------------------------------------------|--------------|
| 79         | female     | 33         | 84.42%                           | +                                        |              |
| 80         | male       | 50         |                                  | +                                        |              |
| 81         | female     | 40         |                                  | +                                        |              |
| 82         | male       | 44         |                                  | +                                        |              |
| 83         | female     | 34         | 85.16%                           | +                                        |              |
| 84         | female     | 44         |                                  | +                                        |              |
| 85         | male       | 33         | 96.17%                           | +                                        |              |
| 86         | female     | 30         | 89.74%                           | +                                        |              |
| 87         | female     | 23         | 73.14%                           | +                                        |              |
| 88         | female     | 47         |                                  | +                                        |              |
| 89         | male       | 22         | 87.65%                           | +                                        |              |
| 90         | male       | 44         |                                  | +                                        |              |
| 91         | male       | 33         | 89.46%                           | +                                        |              |
| 92         | male       | 30         | 73.32%                           | +                                        |              |
| 93         | male       | 23         | 62.27%                           | +                                        |              |
| 94         | female     | 47         |                                  | +                                        |              |
| 95         | female     | 22         | 64.90%                           | +                                        |              |
| 96         | male       | 31         | 71.95%                           | +                                        |              |
| 97         | female     | 39         |                                  | +                                        |              |
| 98         | female     | 36         | 73.97%                           | -                                        |              |
| 99         | female     | 28         |                                  | +                                        |              |
| 100        | male       | 23         | 51.08%                           | -                                        |              |
| 101        | male       | 37         |                                  | +                                        |              |
| 102        | female     | 48         |                                  | +                                        |              |
| 103        | male       | 45         |                                  | +                                        |              |
| 104        | female     | 46         |                                  | +                                        |              |
| 105        | male       | 30         | 78.48%                           | +                                        |              |
| 106        | female     | 23         | 81.75%                           | +                                        |              |

| NO. | Sex    | Age | ELISA inhibition rate (%) | Test results of reagent kit (+/-) | Notes |
|-----|--------|-----|---------------------------|-----------------------------------|-------|
| 107 | female | 47  |                           | +                                 |       |
| 108 | female | 21  |                           | +                                 |       |
| 109 | female | 31  | 47.03%                    | +                                 |       |
| 110 | female | 39  |                           | +                                 |       |
| 111 | female | 36  |                           | +                                 |       |
| 112 | female | 28  |                           | +                                 |       |
| 113 | male   | 23  | 79.54%                    | +                                 |       |
| 114 | male   | 33  | 62.24%                    | +                                 |       |
| 115 | male   | 47  |                           | +                                 |       |
| 116 | male   | 47  |                           | +                                 |       |
| 117 | female | 37  |                           | +                                 |       |
| 118 | female | 54  |                           | -                                 |       |
| 119 | male   | 46  |                           | +                                 |       |
| 120 | female | 36  |                           | -                                 |       |
| 121 | female | 34  | 62.79%                    | +                                 |       |
| 122 | male   | 41  |                           | +                                 |       |
| 123 | female | 23  | 93.15%                    | -                                 |       |
| 124 | male   | 23  | 87.59%                    | +                                 |       |
| 125 | male   | 54  |                           | +                                 |       |
| 126 | male   | 20  |                           | +                                 |       |
| 127 | male   | 31  | 72.79%                    | +                                 |       |
| 128 | female | 39  |                           | +                                 |       |
| 129 | male   | 36  |                           | +                                 |       |
| 130 | female | 28  |                           | +                                 |       |
| 131 | female | 23  | 77.82%                    | +                                 |       |
| 132 | female | 19  | 83.95%                    | +                                 |       |
| 133 | male   | 48  |                           | +                                 |       |
| 134 | male   | 36  |                           | +                                 |       |

| NO. | Sex    | Age | ELISA inhibition rate (%) | Test results of reagent kit (+/-) | Notes |
|-----|--------|-----|---------------------------|-----------------------------------|-------|
| 135 | male   | 38  |                           | +                                 |       |
| 136 | female | 49  |                           | +                                 |       |
| 137 | female | 51  |                           | +                                 |       |
| 138 | female | 30  | 81.62%                    | +                                 |       |
| 139 | female | 55  |                           | +                                 |       |
| 140 | male   | 45  |                           | +                                 |       |
| 141 | male   | 24  | 48.76%                    | -                                 |       |
| 142 | male   | 22  | 86.54%                    | +                                 |       |
| 143 | male   | 35  | 62.27%                    | +                                 |       |
| 144 | male   | 36  |                           | +                                 |       |
| 145 | male   | 46  |                           | +                                 |       |
| 146 | male   | 36  |                           | +                                 |       |
| 147 | male   | 34  | 64.22%                    | +                                 |       |
| 148 | male   | 41  |                           | +                                 |       |
| 149 | male   | 23  | 72.39%                    | +                                 |       |
| 150 | male   | 23  | 58.18%                    | +                                 |       |
| 151 | male   | 54  |                           | +                                 |       |
| 152 | male   | 20  |                           | +                                 |       |
| 153 | female | 31  | 70.86%                    | +                                 |       |
| 154 | female | 39  |                           | +                                 |       |
| 155 | male   | 36  |                           | +                                 |       |
| 156 | female | 28  |                           | +                                 |       |
| 157 | female | 23  | 68.89%                    | +                                 |       |
| 158 | male   | 19  | 80.42%                    | +                                 |       |
| 159 | male   | 48  |                           | +                                 |       |
| 160 | female | 33  | 64.50%                    | +                                 |       |
| 161 | female | 46  |                           | +                                 |       |
| 162 | male   | 23  | 94.51%                    | +                                 |       |

| <b>NO.</b> | <b>Sex</b> | <b>Age</b> | <b>ELISA inhibition rate (%)</b> | <b>Test results of reagent kit (+/-)</b> | <b>Notes</b> |
|------------|------------|------------|----------------------------------|------------------------------------------|--------------|
| 163        | female     | 23         | 83.25%                           | +                                        |              |
| 164        | female     | 54         |                                  | +                                        |              |
| 165        | female     | 20         |                                  | +                                        |              |
| 166        | male       | 31         | 46.78%                           | +                                        |              |
| 167        | male       | 39         |                                  | +                                        |              |
| 168        | female     | 36         |                                  | +                                        |              |
| 169        | female     | 28         |                                  | +                                        |              |
| 170        | female     | 23         | 77.38%                           | +                                        |              |
| 171        | male       | 19         | 81.03%                           | +                                        |              |
| 172        | female     | 48         |                                  | +                                        |              |
| 173        | male       | 33         | 58.64%                           | +                                        |              |
| 174        | male       | 46         |                                  | +                                        |              |
| 175        | male       | 30         | 83.72%                           | +                                        |              |
| 176        | female     | 23         | 61.34%                           | +                                        |              |
| 177        | female     | 47         |                                  | +                                        |              |
| 178        | male       | 19         | 81.38%                           | +                                        |              |
| 179        | female     | 31         | 67.11%                           | +                                        |              |
| 180        | male       | 39         |                                  | +                                        |              |
| 181        | female     | 36         |                                  | +                                        |              |
| 182        | female     | 28         |                                  | +                                        |              |

Abbreviations: red mark: Clinical Samples with inconsistent result by ELISA and this assay kit.

## 10.4 Detection results of pre-immunization sample by naked eye

The detection results of samples from the first affiliated hospital of Henan university and school of medicine of Henan university are shown in Figure 11-22. A total of 684 specimens, including 311 pre-immunization samples, 170 samples 21 days after the first vaccination, 182 samples 21 days after the second vaccination for verification and 21 samples 6 months after the second vaccination.

Detection results of pre-immunization samples (from 1 to 100) by naked eye are shown in Figure 9. All of the detection results are negative.

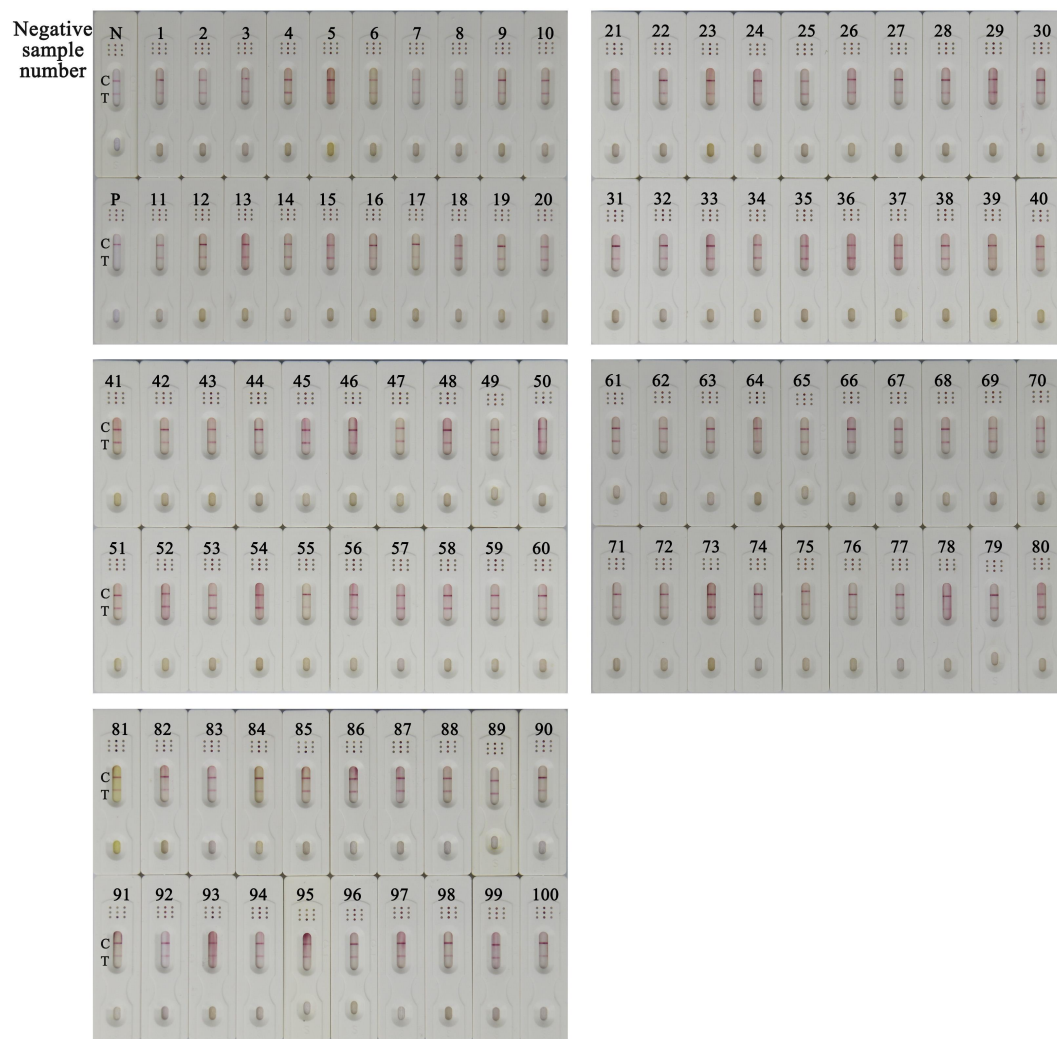

Figure 11 Detection result by naked eye of some pre-immunization sample from number 1-100.

N: negative control; P: positive control; C: control line; T: test line.

Detection results of pre-immunization samples (from 101 to 221) by naked eye are shown in Figure 12. All of the detection results are negative.

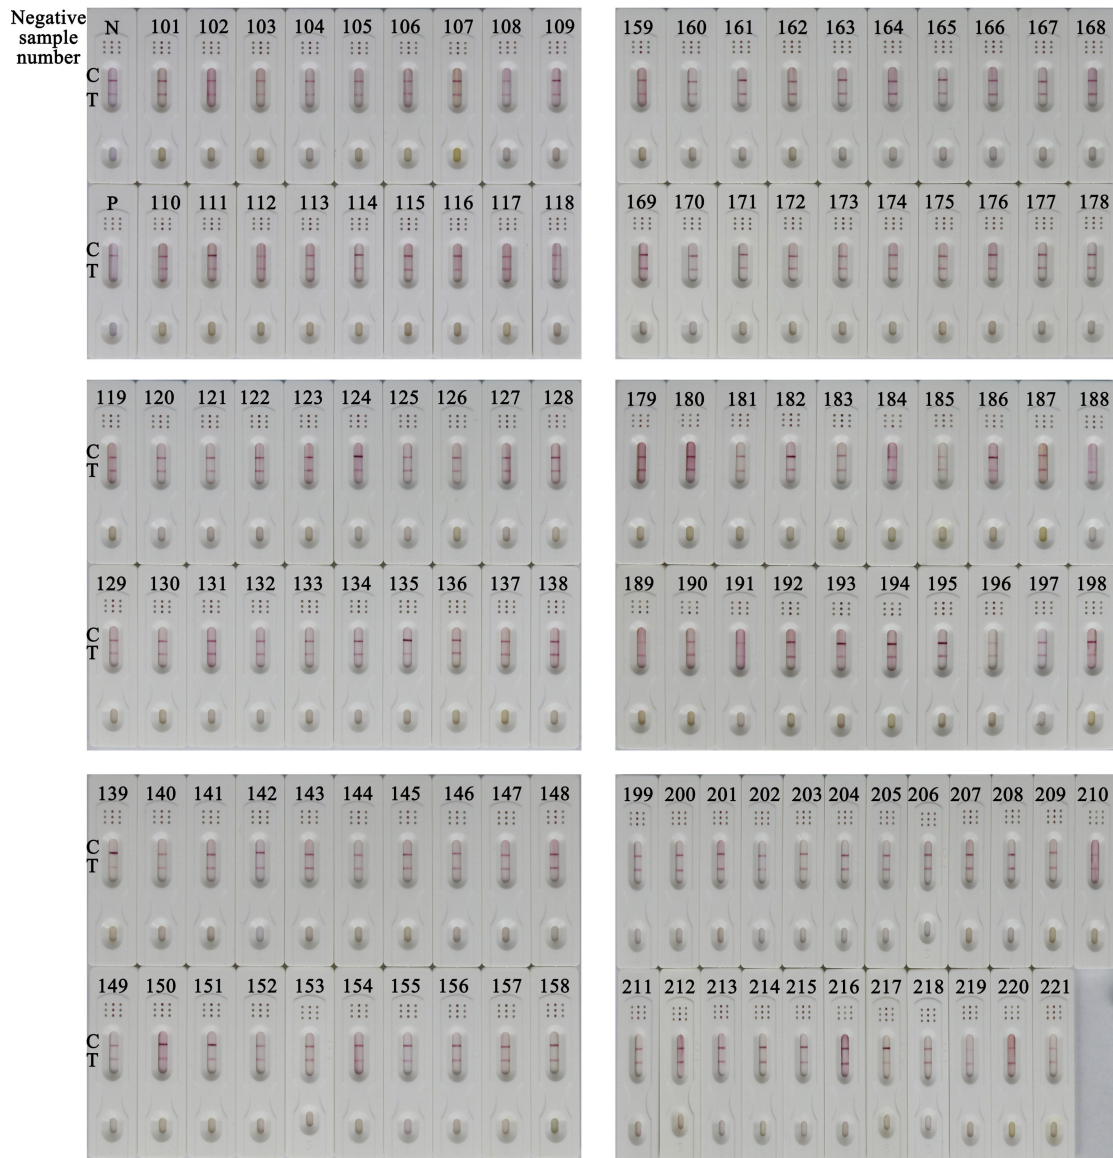

Figure 12 Detection result by naked eye of some pre-immunization sample from 101-221.  
**N:** negative control; **P:** positive control; **C:** control line; **T:** test line.





## 10.5 Detection results of pre-immunization sample by Image J and Graphpad Prism

Detection results of pre-immunization samples (from 1 to 200) by Image J and Graphpad Prism are shown in Figure 14. All of the detection results are negative.

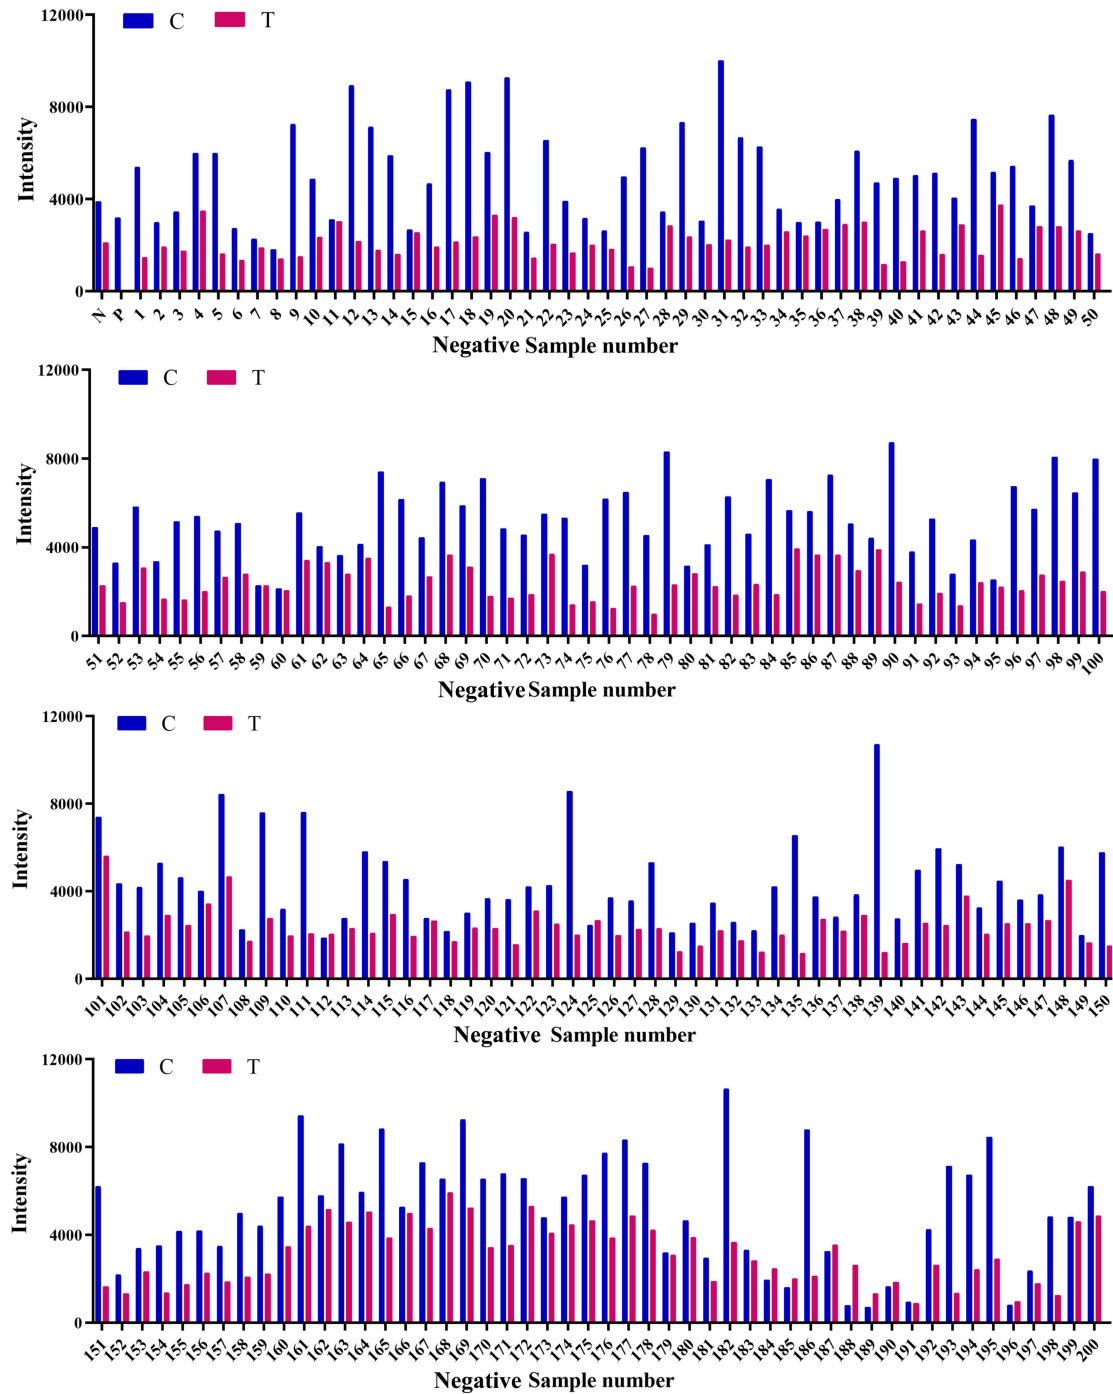

Figure 14 Detection result by Image J and Graphpad Prism of some pre-immunization sample from 1-200.

N: negative control; P: positive control; C: control line; T: test line.

Detection results of pre-immunization samples (from 201 to 311) by Image J and Graphpad Prism are shown in Figure 15. All of the detection results are negative.

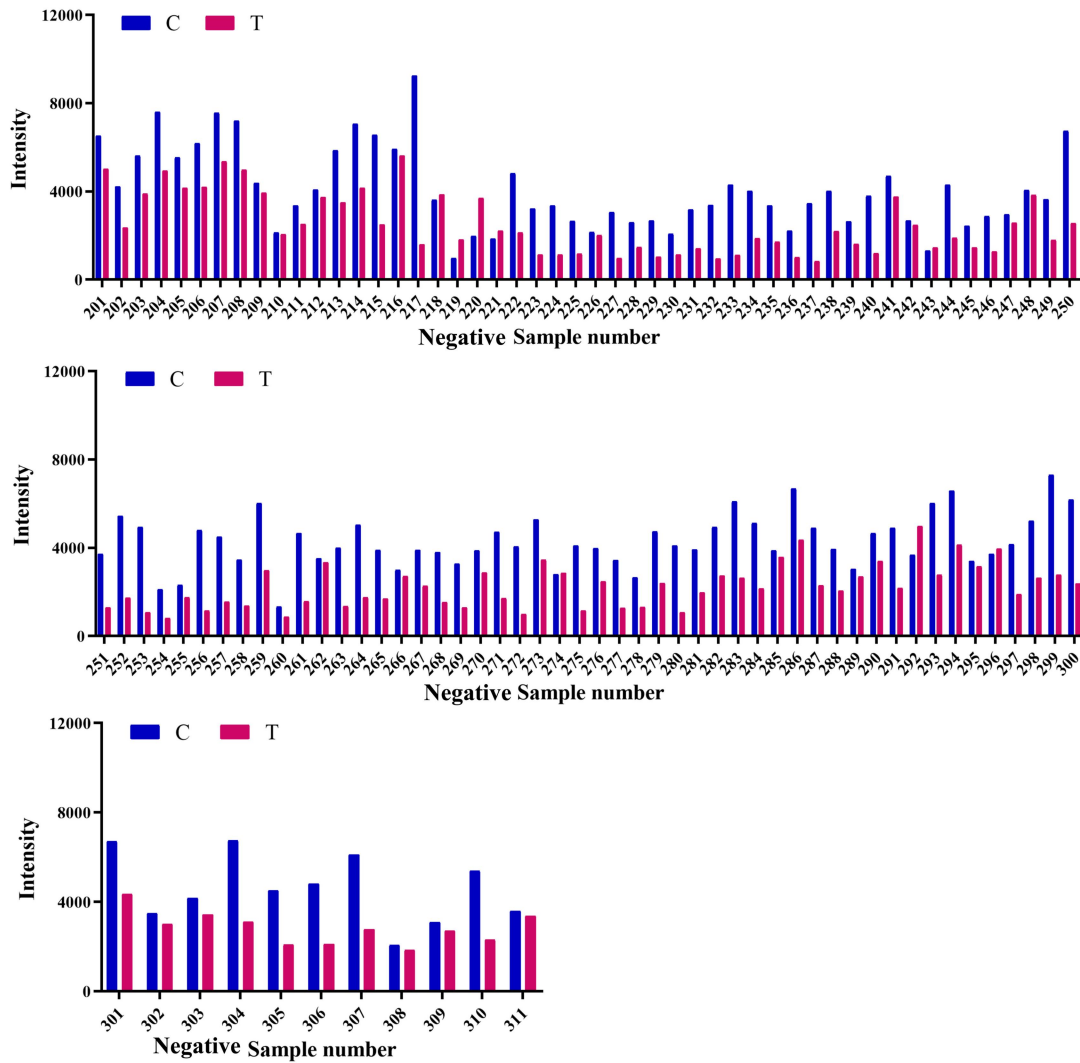

Figure 15 Detection result by Image J and Graphpad Prism of pre-immunization samples from 201-311.

N: negative control; P: positive control; C: control line; T: test line.

## 10.6 Detection Results of first vaccination sample by naked eye

Detection results of samples after the first vaccination (from 1 to 170) by naked eye are shown in Figure 16. All of the detection results are negative.

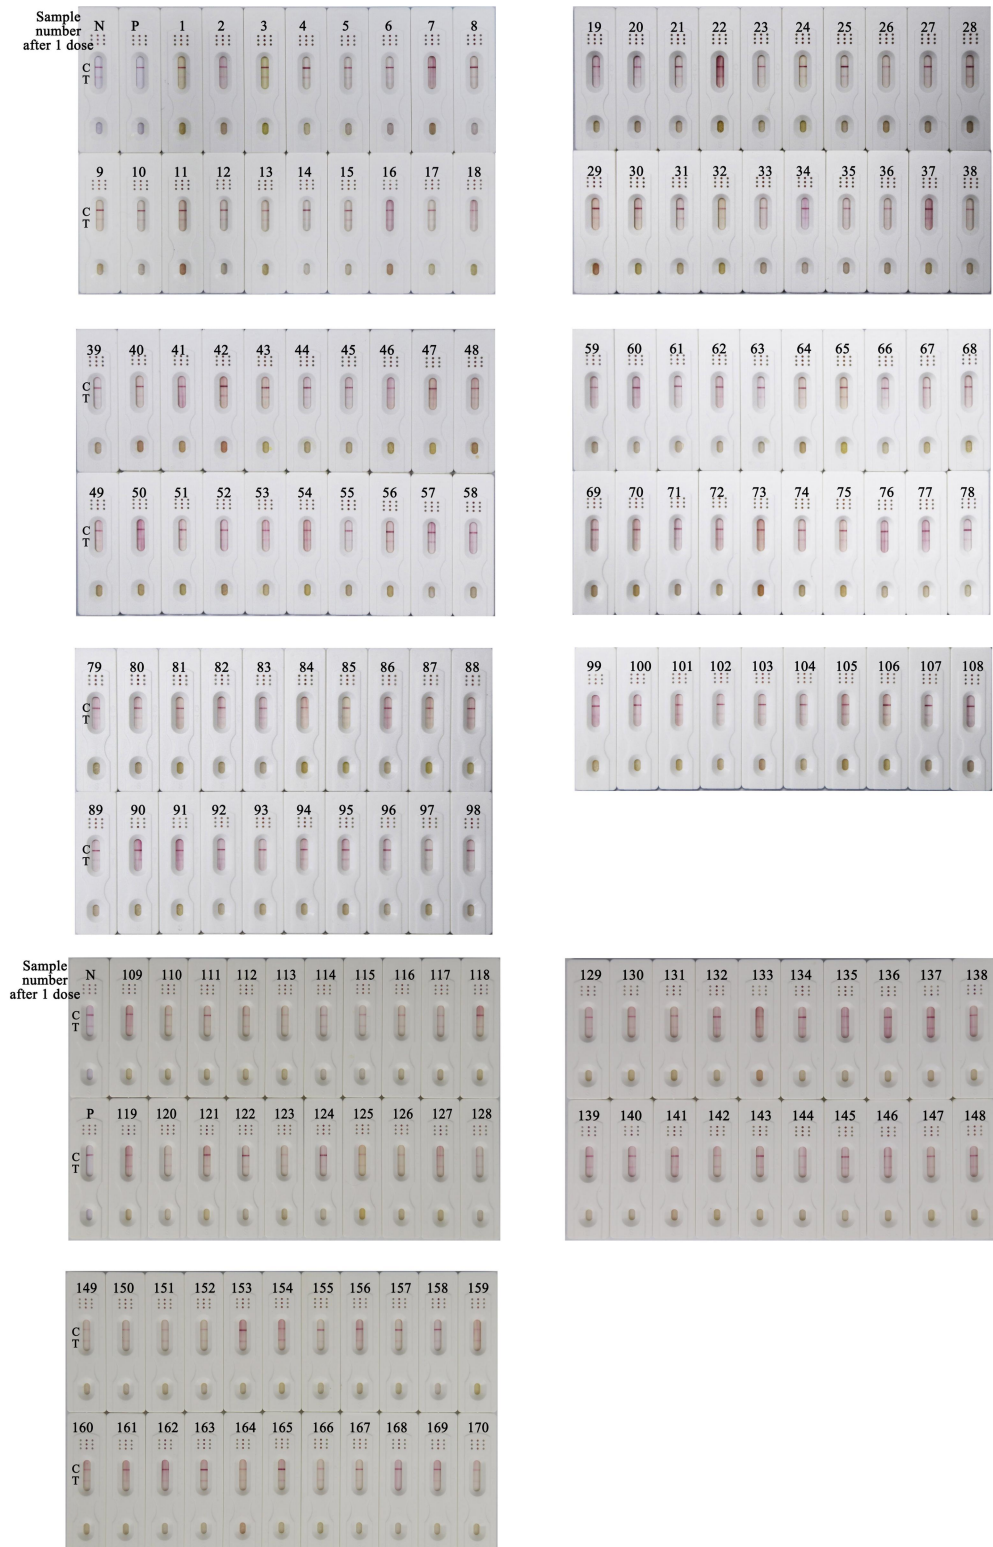

**Figure 16** Detection result by naked eye of 170 samples after 1 dose.  
**N:** negative control; **P:** positive control; **C:** control line; **T:** test line.

## 10.7 Detection results of pre-immunization sample by Image J and Graphpad Prism

### Prism

Detection results of samples after the first vaccination (from 1 to 170) by Image J and Graphpad Prism are shown in Figure 17. All of the detection results are negative.

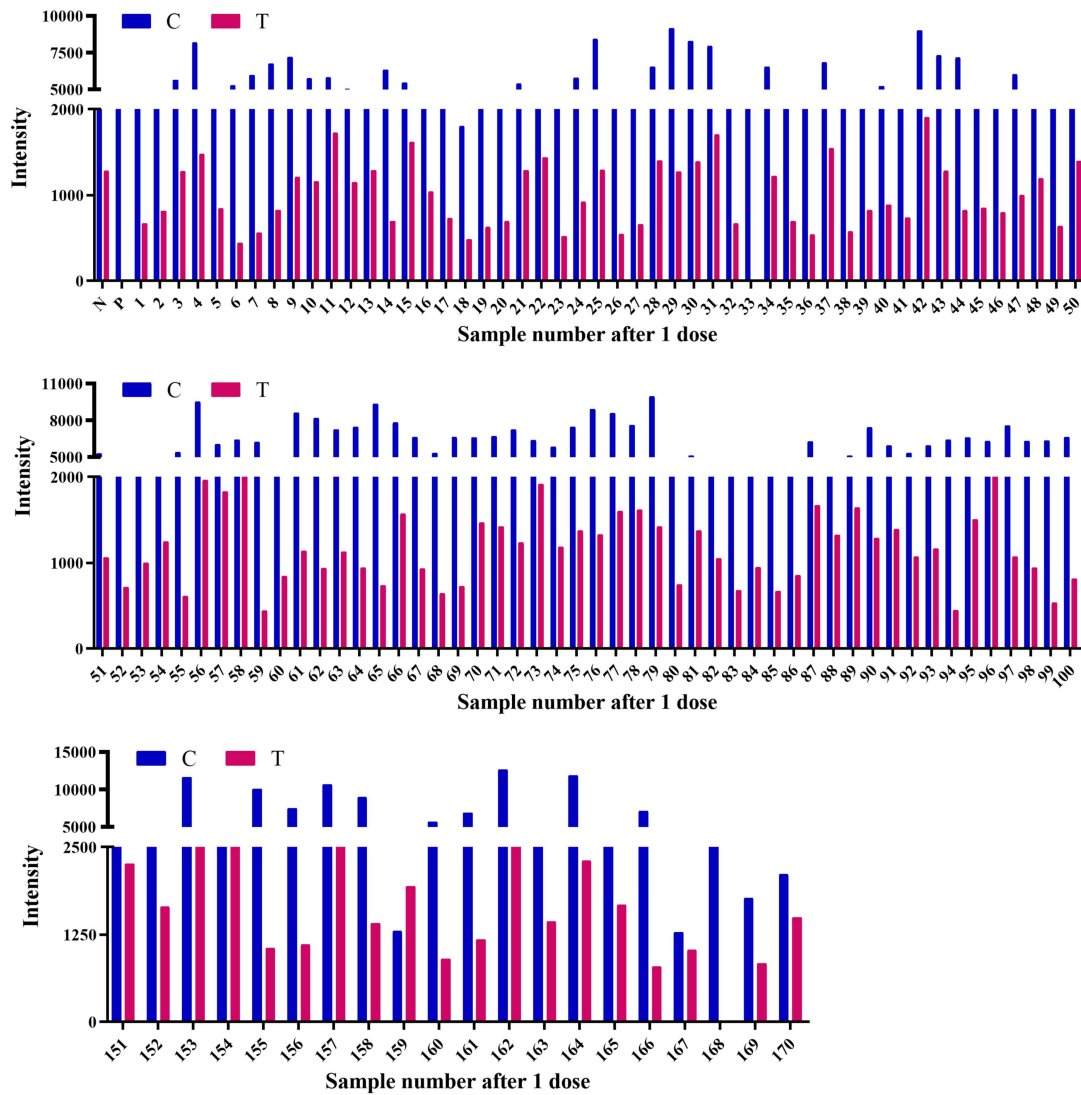

Figure 17 Detection result by Image J and Graphpad Prism of 170 samples after 1 dose.  
N: negative control; P: positive control; C: control line; T: test line.

## 10.8 Detection Results of second vaccination sample by naked eye

Detection results of samples after second vaccination (from 1 to 39) by naked eye are shown in Figure 18. All of the detection results are positive except sample 29 and 38, and sample 29 and 38 were negative and passed further verification by ELISA (Figure 5F in manuscript).

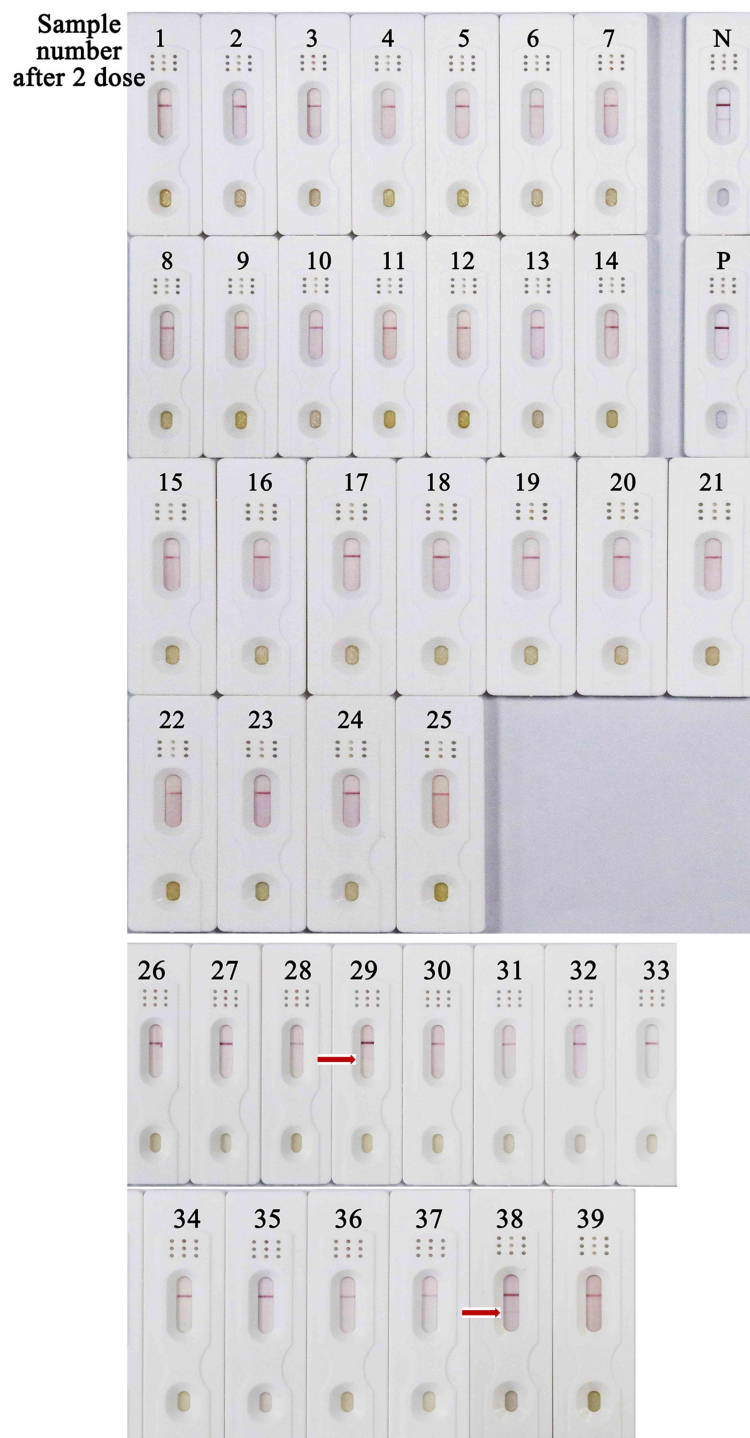

Figure 18 Detection result by naked eye of samples 1-39 after 2 dose.

N: negative control; P: positive control; C: control line; T: test line; Red arrow: Indicates a negative result.

Detection results of samples after second vaccination (from 40 to 81) by naked eye are shown in Figure 19. All of the detection results are positive.

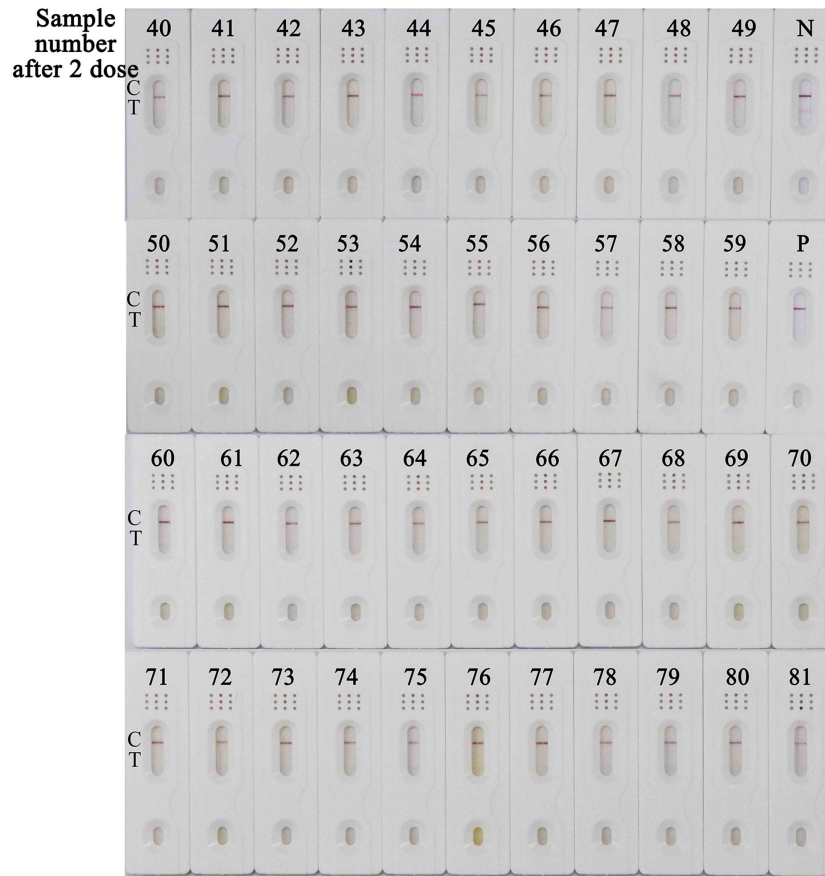

**Figure 19** Detection result by naked eye of samples 40-81 after 2 dose.  
**N:** negative control; **P:** positive control; **C:** control line; **T:** test line.

Detection results of samples after second vaccination (from 82 to 182) by naked eye are shown in Figure 20. All of the detection results are positive except sample 97, 99, 101, 119, 124 and 141, and sample 97 and 124 were negative and passed further verification by ELISA (Figure 5F in manuscript).

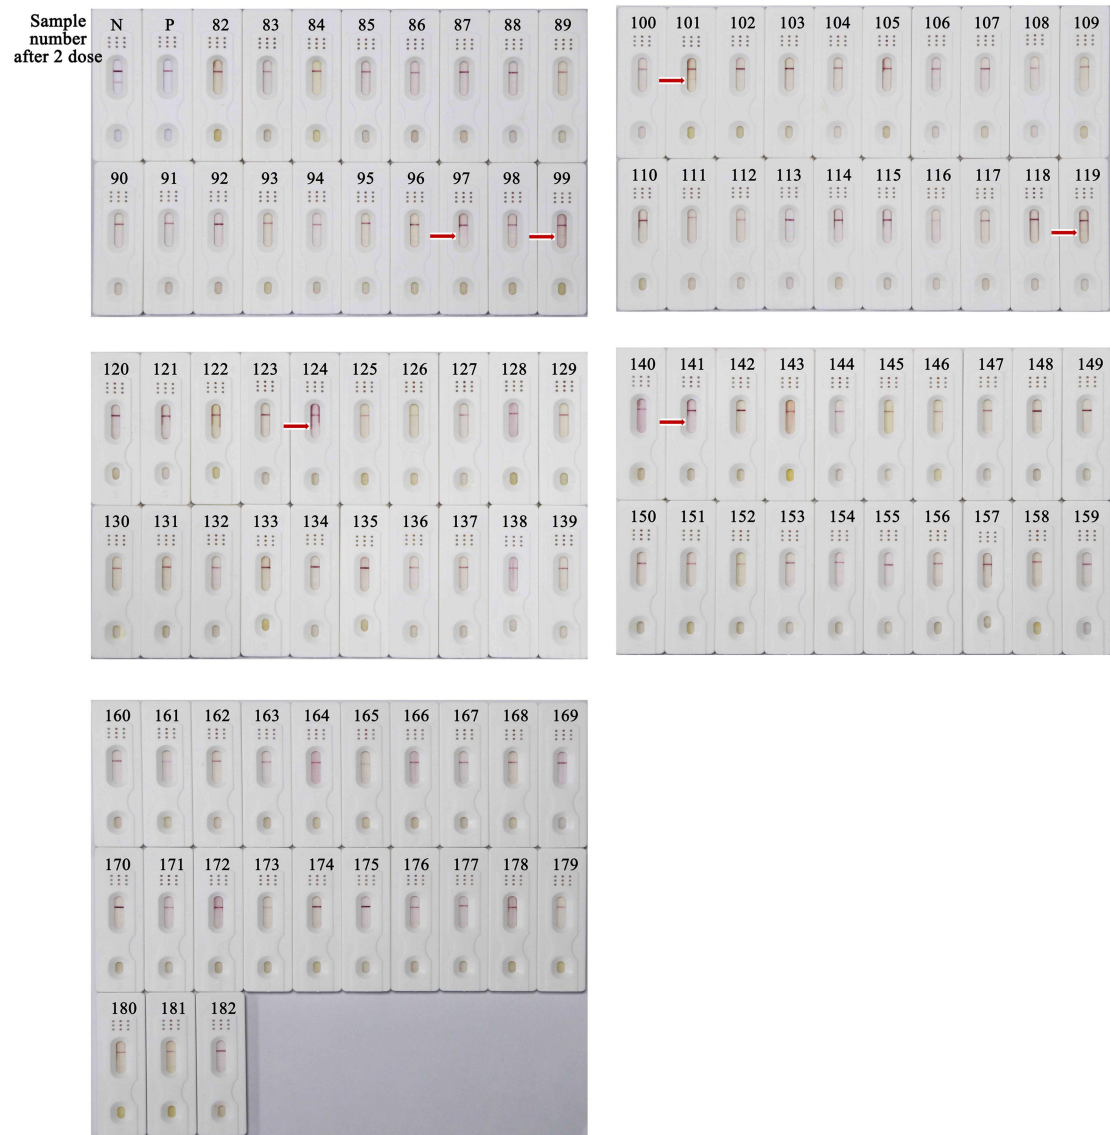

**Figure 20** Detection result by naked eye of samples 82-182 after 2 dose.

**N:** negative control; **P:** positive control; **C:** control line; **T:** test line; **Red arrow:** Indicates a negative result.



## 10.9 Detection results of pre-immunization sample by Image J and Graphpad Prism

### Prism

Detection results of samples after the second vaccination (from 1 to 182) by Image J and Graphpad Prism are shown in Figure 21.

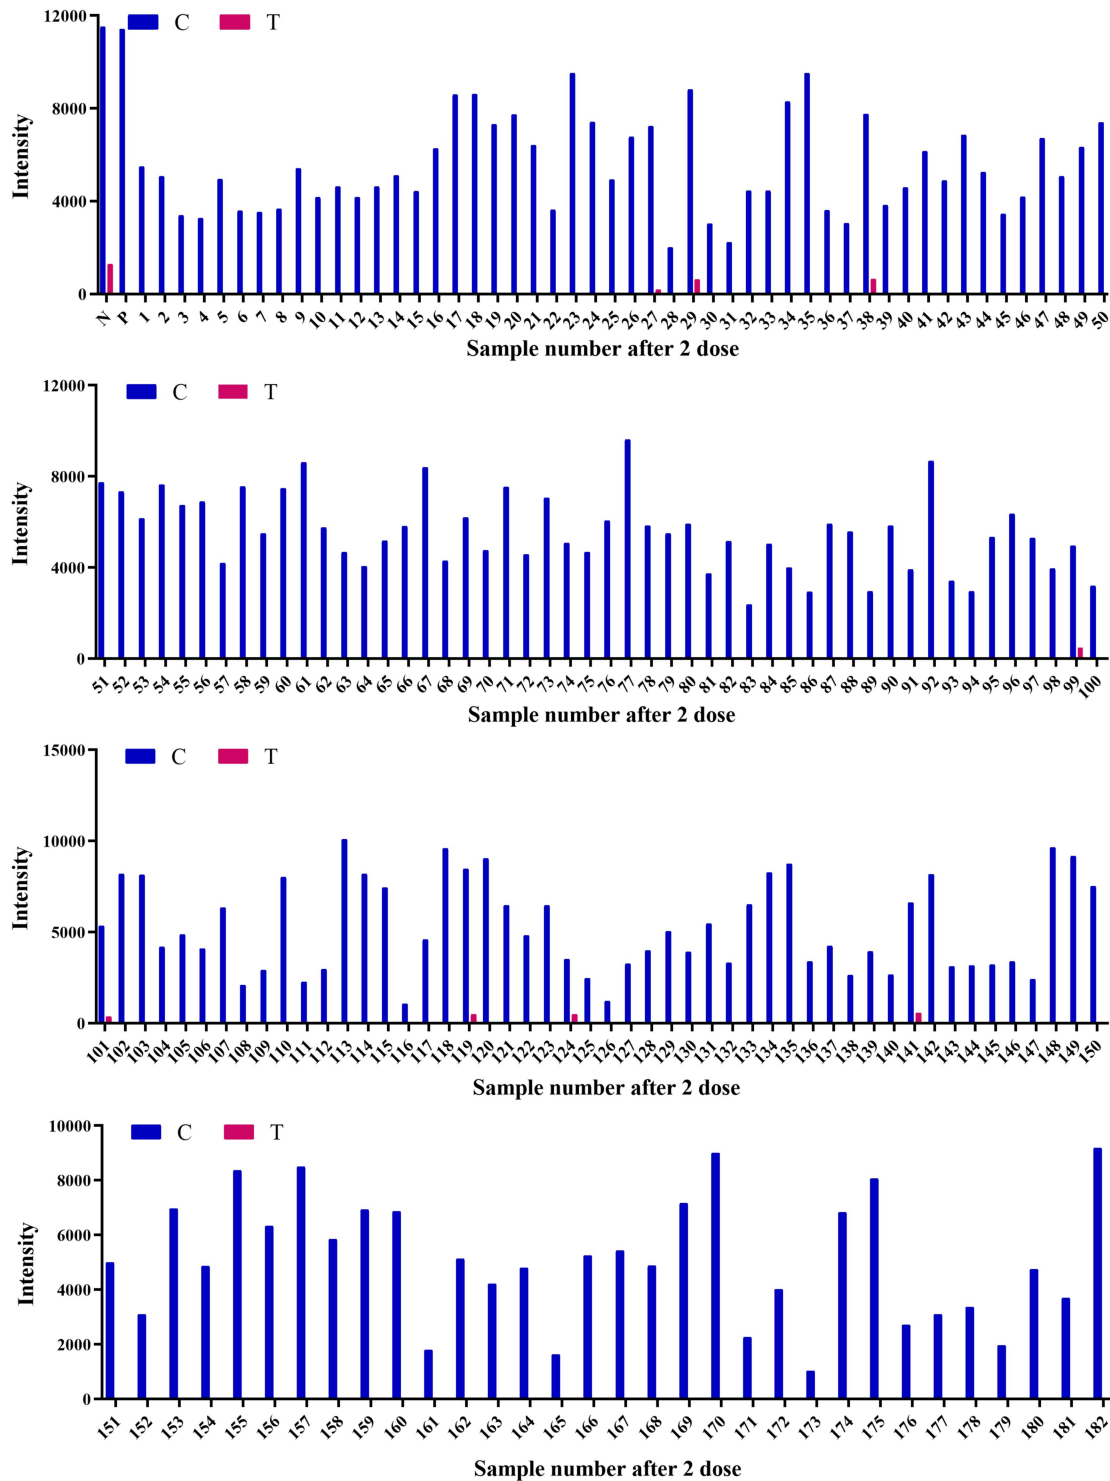

Figure 21 Detection result by Image J and Graphpad Prism of 182 samples after 2 dose.

N: negative control; P: positive control; C: control line; T: test line.

### 10.10 Detection results of 6 months sample after second vaccination by naked eye, Image J and Graphpad Prism

Detection results of samples 6 months after the second vaccination by naked eye (Figure 22a) and Image J, Graphpad Prism (Figure 22b) are shown in Figure 22.

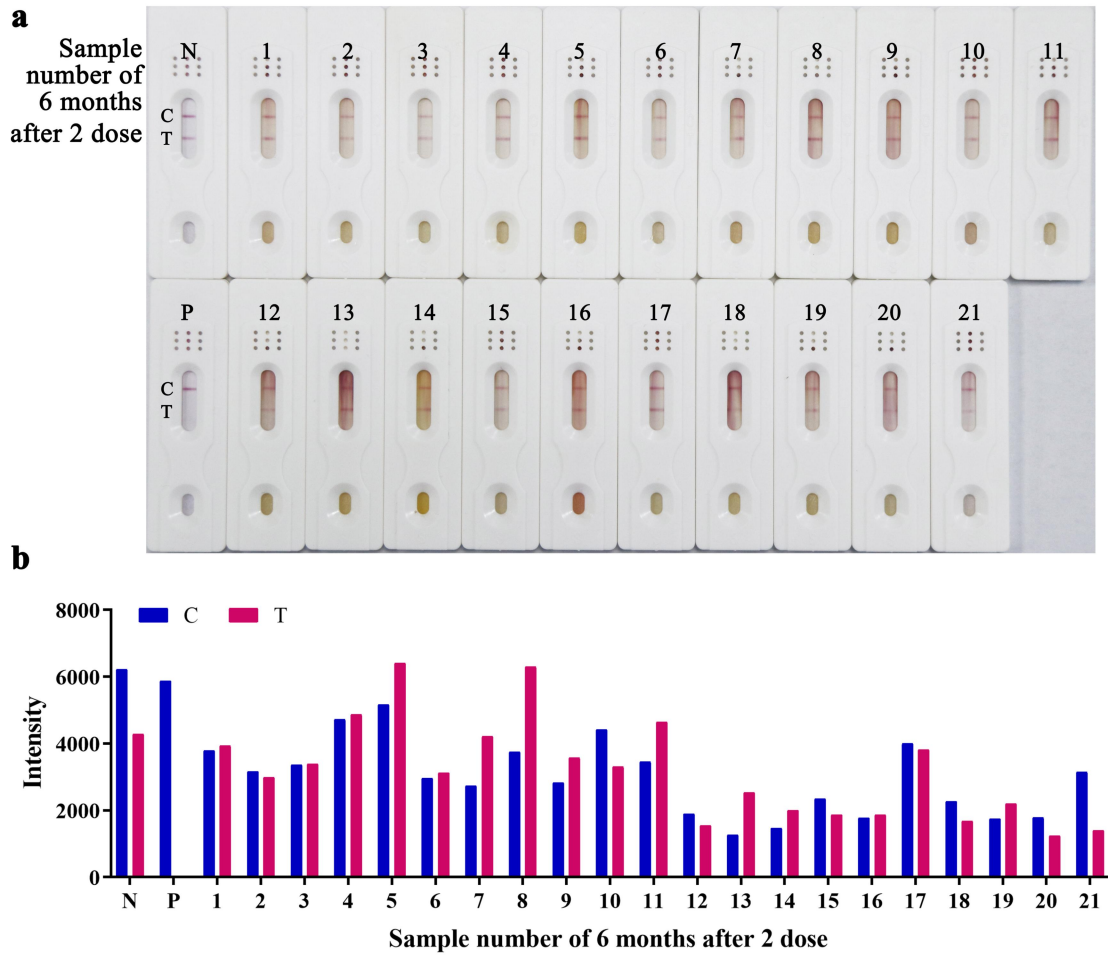

Figure 22 Detection result by naked eye (Figure 20a) and Image J and Graphpad Prism (Figure 20b) of 182 samples after 2 dose.

N: negative control; P: positive control; C: control line; T: test line.

---

## 11 Basic information and detection results of contributors for Table 2

356 clinical samples after infection, which from the first affiliated hospital of Henan university, were detected by ELISA and this research kit. The 356 samples included 15 cases under 20 years old, 77 cases between 20 and 39 years old, 132 cases between 40 and 59 years old, 110 cases between 60 and 79 years old and 22 cases over 80 years old. The basic information and detection results by ELISA and this kit of contributors are shown in Table 4.

### 11.1 Basic information and detection results of infected contributors

**Table 4 The basic information and detection results by ELISA and this kit of infected contributors.**

| NO. | Sex    | Age | ELISA inhibition rate (%) | Test results of reagent kit (+/-) | Notes    |
|-----|--------|-----|---------------------------|-----------------------------------|----------|
| 1   | male   | 54  | 95.64%                    | +                                 |          |
| 2   | female | 93  | 97.35%                    | +                                 |          |
| 3   | male   | 51  | 96.67%                    | +                                 |          |
| 4   | female | 27  | 97.55%                    | +                                 |          |
| 5   | male   | 40  | 97.21%                    | +                                 |          |
| 6   | male   | 48  | 1.65%                     | -                                 | Infected |
| 7   | female | 72  | 97.17%                    | +                                 |          |
| 8   | female | 50  | 97.49%                    | +                                 |          |
| 9   | female | 40  | 97.27%                    | +                                 |          |
| 10  | female | 44  | 6.67%                     | -                                 | Infected |
| 11  | male   | 34  | 97.78%                    | +                                 |          |
| 12  | male   | 44  | 87.50%                    | +                                 |          |
| 13  | male   | 33  | 97.39%                    | +                                 |          |
| 14  | female | 30  | 97.63%                    | +                                 |          |
| 15  | male   | 62  | 97.67%                    | +                                 |          |
| 16  | male   | 44  | 97.48%                    | +                                 |          |
| 17  | male   | 32  | 97.71%                    | +                                 |          |
| 18  | female | 74  | 97.64%                    | +                                 |          |
| 19  | female | 47  | 97.67%                    | +                                 |          |

| <b>NO.</b> | <b>Sex</b> | <b>Age</b> | <b>ELISA inhibition rate (%)</b> | <b>Test results of reagent kit (+/-)</b> | <b>Notes</b> |
|------------|------------|------------|----------------------------------|------------------------------------------|--------------|
| 20         | female     | 17         | 97.41%                           | +                                        |              |
| 21         | female     | 54         | 97.48%                           | +                                        |              |
| 22         | male       | 40         | 97.80%                           | +                                        |              |
| 23         | female     | 55         | 97.72%                           | +                                        |              |
| 24         | male       | 36         | 97.43%                           | +                                        |              |
| 25         | male       | 30         | 97.53%                           | +                                        |              |
| 26         | female     | 43         | 97.50%                           | +                                        |              |
| 27         | female     | 52         | 97.43%                           | +                                        |              |
| 28         | male       | 42         | 97.41%                           | +                                        |              |
| 29         | male       | 31         | 97.81%                           | +                                        |              |
| 30         | male       | 25         | 95.49%                           | +                                        |              |
| 31         | female     | 44         | 97.52%                           | +                                        |              |
| 32         | male       | 53         | 97.62%                           | +                                        |              |
| 33         | female     | 36         | 97.63%                           | +                                        |              |
| 34         | male       | 49         | 79.66%                           | +                                        |              |
| 35         | female     | 63         | 97.48%                           | +                                        |              |
| 36         | male       | 50         | 97.18%                           | +                                        |              |
| 37         | male       | 35         | 97.66%                           | +                                        |              |
| 38         | male       | 42         | 97.24%                           | +                                        |              |
| 39         | male       | 47         | 89.10%                           | +                                        |              |
| 40         | female     | 32         | 89.35%                           | +                                        |              |
| 41         | male       | 35         | 97.63%                           | +                                        |              |
| 42         | female     | 38         | 95.15%                           | +                                        |              |
| 43         | female     | 54         | 97.08%                           | +                                        |              |
| 44         | female     | 53         | 97.18%                           | +                                        |              |
| 45         | male       | 16         | 97.63%                           | +                                        |              |
| 46         | male       | 58         | 97.11%                           | +                                        |              |
| 47         | male       | 68         | 97.72%                           | +                                        |              |

| <b>NO.</b> | <b>Sex</b> | <b>Age</b> | <b>ELISA inhibition rate (%)</b> | <b>Test results of reagent kit (+/-)</b> | <b>Notes</b> |
|------------|------------|------------|----------------------------------|------------------------------------------|--------------|
| 48         | female     | 80         | 17.15%                           | -                                        | Uninfected   |
| 49         | female     | 13         | 97.62%                           | +                                        |              |
| 50         | female     | 72         | 47.86%                           | +                                        |              |
| 51         | female     | 73         | 8.31%                            | -                                        | Infected     |
| 52         | male       | 18         | 10.19%                           | -                                        | Infected     |
| 53         | male       | 6          | 97.42%                           | +                                        |              |
| 54         | male       | 82         | 3.20%                            | -                                        | Infected     |
| 55         | female     | 23         | 97.63%                           | +                                        |              |
| 56         | female     | 65         | 97.41%                           | +                                        |              |
| 57         | male       | 48         | 97.32%                           | +                                        |              |
| 58         | male       | 77         | 96.90%                           | +                                        |              |
| 59         | male       | 66         | 51.68%                           | -                                        | Infected     |
| 60         | male       | 69         | 97.10%                           | +                                        |              |
| 61         | male       | 56         | 96.27%                           | +                                        |              |
| 62         | male       | 68         | 96.12%                           | +                                        |              |
| 63         | male       | 50         | 97.40%                           | +                                        |              |
| 64         | male       | 63         | 63.12%                           | +                                        |              |
| 65         | male       | 64         | 97.32%                           | +                                        |              |
| 66         | male       | 39         | 97.50%                           | +                                        |              |
| 67         | male       | 48         | 95.72%                           | +                                        |              |
| 68         | male       | 81         | 96.61%                           | +                                        |              |
| 69         | male       | 70         | 6.35%                            | -                                        | Infected     |
| 70         | female     | 59         | 2.18%                            | -                                        | Infected     |
| 71         | female     | 30         | 97.49%                           | +                                        |              |
| 72         | male       | 43         | 97.45%                           | +                                        |              |
| 73         | female     | 70         | 97.52%                           | +                                        |              |
| 74         | female     | 18         | 11.72%                           | -                                        | Infected     |
| 75         | female     | 72         | 12.26%                           | -                                        | Infected     |

| <b>NO.</b> | <b>Sex</b> | <b>Age</b> | <b>ELISA inhibition rate (%)</b> | <b>Test results of reagent kit (+/-)</b> | <b>Notes</b> |
|------------|------------|------------|----------------------------------|------------------------------------------|--------------|
| 76         | male       | 69         | 10.90%                           | -                                        | Infected     |
| 77         | male       | 66         | 78.03%                           | +                                        |              |
| 78         | female     | 56         | 2.64%                            | -                                        | Infected     |
| 79         | female     | 73         | 97.64%                           | +                                        |              |
| 80         | female     | 20         | 92.27%                           | +                                        |              |
| 81         | male       | 64         | 97.53%                           | +                                        |              |
| 82         | female     | 65         | 13.65%                           | +                                        | Infected     |
| 83         | male       | 43         | 93.88%                           | -                                        | Infected     |
| 84         | female     | 73         | 88.03%                           | +                                        |              |
| 85         | female     | 67         | 9.00%                            | +                                        | Infected     |
| 86         | male       | 64         | 95.76%                           | -                                        | Infected     |
| 87         | female     | 60         | 97.53%                           | +                                        |              |
| 88         | male       | 58         | 97.61%                           | +                                        |              |
| 89         | male       | 43         | 97.42%                           | +                                        |              |
| 90         | male       | 58         | 97.60%                           | +                                        |              |
| 91         | female     | 11         | 95.87%                           | +                                        |              |
| 92         | female     | 18         | 97.44%                           | +                                        |              |
| 93         | male       | 54         | 12.57%                           | -                                        | Infected     |
| 94         | female     | 58         | 97.51%                           | +                                        |              |
| 95         | male       | 69         | 97.31%                           | +                                        |              |
| 96         | female     | 79         | 94.09%                           | +                                        |              |
| 97         | female     | 54         | 96.85%                           | +                                        |              |
| 98         | female     | 42         | 97.48%                           | +                                        |              |
| 99         | female     | 52         | 97.32%                           | +                                        |              |
| 100        | female     | 47         | 70.38%                           | +                                        |              |
| 101        | female     | 59         | 97.33%                           | +                                        |              |
| 102        | female     | 50         | 95.06%                           | +                                        |              |
| 103        | male       | 85         | 2.09%                            | -                                        | Infected     |

| <b>NO.</b> | <b>Sex</b> | <b>Age</b> | <b>ELISA inhibition rate (%)</b> | <b>Test results of reagent kit (+/-)</b> | <b>Notes</b> |
|------------|------------|------------|----------------------------------|------------------------------------------|--------------|
| 104        | male       | 78         | 2.30%                            | -                                        | Infected     |
| 105        | male       | 53         | 96.85%                           | +                                        |              |
| 106        | male       | 13         | 97.55%                           | +                                        |              |
| 107        | female     | 54         | 97.48%                           | +                                        |              |
| 108        | female     | 67         | 12.08%                           | -                                        | Infected     |
| 109        | male       | 60         | 97.11%                           | +                                        |              |
| 110        | female     | 32         | 94.59%                           | +                                        |              |
| 111        | female     | 73         | 17.30%                           | -                                        | Infected     |
| 112        | male       | 83         | 97.11%                           | +                                        |              |
| 113        | male       | 68         | 9.57%                            | -                                        | Infected     |
| 114        | male       | 68         | 97.51%                           | +                                        |              |
| 115        | female     | 59         | 96.92%                           | +                                        |              |
| 116        | male       | 23         | 97.57%                           | +                                        |              |
| 117        | male       | 47         | 76.05%                           | +                                        |              |
| 118        | female     | 46         | 97.41%                           | +                                        |              |
| 119        | female     | 87         | 9.18%                            | -                                        | Infected     |
| 120        | male       | 69         | 97.32%                           | +                                        |              |
| 121        | female     | 69         | 97.30%                           | +                                        |              |
| 122        | male       | 24         | 97.55%                           | +                                        |              |
| 123        | male       | 70         | 12.34%                           | -                                        | Infected     |
| 124        | female     | 30         | 97.54%                           | +                                        |              |
| 125        | female     | 70         | 2.19%                            | -                                        | Infected     |
| 126        | male       | 51         | 97.79%                           | +                                        |              |
| 127        | male       | 29         | 58.81%                           | +                                        |              |
| 128        | female     | 59         | 97.44%                           | +                                        |              |
| 129        | male       | 61         | 10.44%                           | -                                        | Infected     |
| 130        | male       | 85         | 10.90%                           | +                                        | Infected     |
| 131        | male       | 41         | 97.43%                           | +                                        |              |

| <b>NO.</b> | <b>Sex</b> | <b>Age</b> | <b>ELISA inhibition rate (%)</b> | <b>Test results of reagent kit (+/-)</b> | <b>Notes</b> |
|------------|------------|------------|----------------------------------|------------------------------------------|--------------|
| 132        | female     | 64         | 97.16%                           | +                                        |              |
| 133        | female     | 27         | 97.35%                           | +                                        |              |
| 134        | female     | 70         | 97.35%                           | +                                        |              |
| 135        | male       | 71         | 5.60%                            | -                                        | Infected     |
| 137        | female     | 90         | 9.17%                            | -                                        | Infected     |
| 138        | male       | 62         | 97.36%                           | +                                        |              |
| 139        | male       | 28         | 97.31%                           | +                                        |              |
| 140        | female     | 71         | 10.56%                           | -                                        | Infected     |
| 141        | male       | 56         | 97.06%                           | +                                        |              |
| 142        | female     | 69         | 89.68%                           | +                                        |              |
| 144        | female     | 59         | 97.42%                           | +                                        |              |
| 145        | male       | 61         | 14.57%                           | -                                        | Infected     |
| 146        | female     | 62         | 96.25%                           | +                                        |              |
| 147        | male       | 87         | 9.21%                            | -                                        | Infected     |
| 148        | female     | 37         | 97.13%                           | +                                        |              |
| 149        | male       | 67         | 93.50%                           | +                                        |              |
| 150        | male       | 72         | 97.08%                           | +                                        |              |
| 151        | female     | 80         | 97.48%                           | +                                        |              |
| 152        | female     | 69         | 12.37%                           | -                                        | Infected     |
| 153        | female     | 70         | 11.07%                           | -                                        | Infected     |
| 154        | female     | 56         | 18.38%                           | -                                        | Uninfected   |
| 155        | male       | 21         | 96.74%                           | +                                        |              |
| 156        | female     | 29         | 97.44%                           | +                                        |              |
| 157        | female     | 46         | 97.13%                           | +                                        |              |
| 158        | male       | 32         | 97.39%                           | +                                        |              |
| 159        | male       | 49         | 97.46%                           | +                                        |              |
| 160        | female     | 46         | 97.43%                           | +                                        |              |
| 161        | male       | 67         | 97.46%                           | +                                        |              |



| <b>NO.</b> | <b>Sex</b> | <b>Age</b> | <b>ELISA inhibition rate (%)</b> | <b>Test results of reagent kit (+/-)</b> | <b>Notes</b> |
|------------|------------|------------|----------------------------------|------------------------------------------|--------------|
| 162        | male       | 17         | 97.37%                           | +                                        |              |
| 163        | male       | 32         | 62.19%                           | -                                        | Infected     |
| 164        | male       | 53         | 97.11%                           | +                                        |              |
| 165        | male       | 52         | 97.35%                           | +                                        |              |
| 166        | male       | 51         | 97.35%                           | +                                        |              |
| 167        | female     | 69         | 97.38%                           | +                                        |              |
| 168        | female     | 70         | 97.25%                           | +                                        |              |
| 169        | male       | 77         | 96.80%                           | +                                        |              |
| 170        | male       | 54         | 96.70%                           | +                                        |              |
| 171        | male       | 60         | 13.14%                           | -                                        | Infected     |
| 172        | male       | 57         | 95.86%                           | +                                        |              |
| 173        | female     | 69         | 95.23%                           | +                                        |              |
| 174        | female     | 61         | 96.84%                           | +                                        |              |
| 175        | male       | 47         | 97.13%                           | +                                        |              |
| 176        | male       | 61         | 15.07%                           | -                                        | Infected     |
| 177        | male       | 45         | 97.04%                           | +                                        |              |
| 178        | male       | 50         | 12.94%                           | -                                        | Infected     |
| 179        | male       | 59         | 95.21%                           | +                                        |              |
| 180        | female     | 60         | 96.62%                           | +                                        |              |
| 181        | male       | 71         | 96.09%                           | +                                        |              |
| 182        | female     | 88         | 17.10%                           | -                                        | Infected     |
| 183        | male       | 69         | 96.95%                           | +                                        |              |
| 184        | male       | 88         | 4.17%                            | -                                        | Infected     |
| 185        | female     | 40         | 97.17%                           | +                                        |              |
| 186        | female     | 85         | 97.38%                           | +                                        |              |
| 187        | female     | 78         | 96.70%                           | +                                        |              |
| 188        | female     | 86         | 97.31%                           | +                                        |              |
| 190        | male       | 44         | 96.28%                           | +                                        |              |

| <b>NO.</b> | <b>Sex</b> | <b>Age</b> | <b>ELISA inhibition rate (%)</b> | <b>Test results of reagent kit (+/-)</b> | <b>Notes</b> |
|------------|------------|------------|----------------------------------|------------------------------------------|--------------|
| 191        | female     | 68         | 74.97%                           | +                                        |              |
| 192        | male       | 60         | 97.26%                           | +                                        |              |
| 193        | male       | 63         | 97.30%                           | +                                        |              |
| 194        | male       | 85         | 9.75%                            | -                                        | Infected     |
| 195        | male       | 78         | 97.29%                           | +                                        |              |
| 196        | female     | 32         | 97.37%                           | +                                        |              |
| 197        | female     | 72         | 96.93%                           | +                                        |              |
| 198        | female     | 28         | 97.31%                           | +                                        |              |
| 199        | male       | 93         | 2.44%                            | -                                        | Infected     |
| 200        | female     | 73         | 96.92%                           | +                                        |              |
| 201        | female     | 59         | 97.17%                           | +                                        |              |
| 202        | male       | 75         | 52.12%                           | -                                        | Infected     |
| 203        | male       | 61         | 89.49%                           | +                                        |              |
| 204        | male       | 82         | 66.72%                           | +                                        |              |
| 205        | female     | 64         | 33.67%                           | +                                        |              |
| 206        | female     | 39         | 85.48%                           | -                                        | Infected     |
| 207        | female     | 31         | 97.34%                           | +                                        |              |
| 208        | male       | 35         | 97.41%                           | +                                        |              |
| 209        | female     | 51         | 97.02%                           | +                                        |              |
| 210        | male       | 29         | 97.09%                           | -                                        | Infected     |
| 211        | male       | 57         | 97.48%                           | +                                        |              |
| 212        | female     | 58         | 96.99%                           | +                                        |              |
| 213        | female     | 34         | 97.18%                           | +                                        |              |
| 214        | male       | 65         | 97.28%                           | +                                        |              |
| 215        | female     | 44         | 97.43%                           | +                                        |              |
| 216        | male       | 24         | 94.27%                           | +                                        |              |
| 217        | female     | 68         | 96.73%                           | +                                        |              |
| 218        | female     | 16         | 97.25%                           | +                                        |              |

| <b>NO.</b> | <b>Sex</b> | <b>Age</b> | <b>ELISA inhibition rate (%)</b> | <b>Test results of reagent kit (+/-)</b> | <b>Notes</b> |
|------------|------------|------------|----------------------------------|------------------------------------------|--------------|
| 219        | male       | 58         | 97.12%                           | +                                        |              |
| 220        | female     | 52         | 97.49%                           | +                                        |              |
| 221        | female     | 59         | 95.26%                           | +                                        |              |
| 222        | female     | 45         | 97.35%                           | +                                        |              |
| 223        | male       | 59         | 96.99%                           | +                                        |              |
| 224        | male       | 39         | 96.80%                           | +                                        |              |
| 225        | male       | 54         | 97.46%                           | +                                        |              |
| 226        | female     | 55         | 97.13%                           | +                                        |              |
| 227        | female     | 31         | 97.43%                           | +                                        |              |
| 228        | male       | 40         | 97.21%                           | +                                        |              |
| 229        | female     | 50         | 96.59%                           | +                                        |              |
| 230        | female     | 45         | 4.20%                            | -                                        | Infected     |
| 231        | male       | 62         | 96.37%                           | +                                        |              |
| 232        | male       | 31         | 96.78%                           | +                                        |              |
| 233        | female     | 39         | 5.06%                            | -                                        | Uninfected   |
| 234        | female     | 36         | 97.23%                           | +                                        |              |
| 235        | female     | 70         | 97.25%                           | +                                        |              |
| 236        | female     | 74         | 10.92%                           | -                                        | Infected     |
| 237        | female     | 27         | 97.31%                           | +                                        |              |
| 238        | female     | 68         | 97.23%                           | +                                        |              |
| 239        | female     | 56         | 53.30%                           | -                                        | Infected     |
| 240        | male       | 22         | 97.25%                           | +                                        |              |
| 241        | female     | 50         | 97.37%                           | +                                        |              |
| 242        | female     | 72         | 6.13%                            | -                                        | Infected     |
| 243        | female     | 59         | 97.03%                           | +                                        |              |
| 244        | female     | 32         | 97.43%                           | +                                        |              |
| 245        | male       | 64         | 97.41%                           | +                                        |              |
| 246        | female     | 33         | 73.14%                           | -                                        | Infected     |

| <b>NO.</b> | <b>Sex</b> | <b>Age</b> | <b>ELISA inhibition rate (%)</b> | <b>Test results of reagent kit (+/-)</b> | <b>Notes</b> |
|------------|------------|------------|----------------------------------|------------------------------------------|--------------|
| 247        | male       | 61         | 96.31%                           | +                                        |              |
| 248        | female     | 50         | 97.12%                           | +                                        |              |
| 249        | male       | 47         | 66.08%                           | +                                        |              |
| 250        | female     | 45         | 95.93%                           | +                                        |              |
| 251        | female     | 55         | 96.22%                           | +                                        |              |
| 252        | male       | 70         | 94.92%                           | +                                        |              |
| 253        | female     | 43         | 83.49%                           | -                                        | Infected     |
| 254        | male       | 42         | 97.39%                           | +                                        |              |
| 255        | female     | 28         | 96.96%                           | +                                        |              |
| 256        | male       | 23         | 96.68%                           | +                                        |              |
| 257        | male       | 90         | 6.76%                            | -                                        | Infected     |
| 260        | male       | 48         | 96.79%                           | +                                        |              |
| 261        | female     | 69         | 97.25%                           | +                                        |              |
| 262        | female     | 46         | 97.17%                           | +                                        |              |
| 263        | female     | 22         | 96.89%                           | +                                        |              |
| 264        | male       | 85         | 4.71%                            | -                                        | Infected     |
| 265        | male       | 61         | 3.42%                            | -                                        | Infected     |
| 266        | male       | 73         | 10.85%                           | -                                        | Infected     |
| 267        | female     | 66         | 96.86%                           | +                                        |              |
| 268        | male       | 21         | 96.15%                           | +                                        |              |
| 269        | female     | 37         | 51.24%                           | -                                        | Infected     |
| 270        | male       | 55         | 96.18%                           | +                                        |              |
| 271        | male       | 75         | 97.31%                           | +                                        |              |
| 272        | male       | 9          | 96.31%                           | +                                        |              |
| 273        | female     | 59         | 96.88%                           | +                                        |              |
| 274        | female     | 86         | 16.48%                           | -                                        | Infected     |
| 276        | female     | 62         | 96.87%                           | +                                        |              |
| 277        | female     | 25         | 83.67%                           | -                                        | Infected     |

| <b>NO.</b> | <b>Sex</b> | <b>Age</b> | <b>ELISA inhibition rate (%)</b> | <b>Test results of reagent kit (+/-)</b> | <b>Notes</b> |
|------------|------------|------------|----------------------------------|------------------------------------------|--------------|
| 278        | male       | 77         | 94.88%                           | +                                        |              |
| 279        | male       | 67         | 96.20%                           | +                                        |              |
| 280        | female     | 57         | 94.75%                           | +                                        |              |
| 282        | female     | 49         | 84.31%                           | -                                        | Infected     |
| 283        | male       | 38         | 2.58%                            | -                                        | Infected     |
| 284        | female     | 49         | 6.88%                            | -                                        | Infected     |
| 286        | male       | 50         | 97.08%                           | +                                        |              |
| 287        | male       | 53         | 96.91%                           | -                                        | Infected     |
| 288        | male       | 78         | 14.02%                           | -                                        | Infected     |
| 289        | male       | 43         | 3.87%                            | -                                        | Infected     |
| 290        | male       | 78         | 11.98%                           | -                                        | Infected     |
| 291        | female     | 6          | 96.32%                           | +                                        |              |
| 292        | male       | 77         | 95.75%                           | +                                        |              |
| 293        | female     | 48         | 96.45%                           | +                                        |              |
| 294        | male       | 52         | 92.60%                           | +                                        |              |
| 295        | female     | 33         | 3.42%                            | -                                        | Infected     |
| 297        | male       | 69         | 15.73%                           | -                                        | Infected     |
| 298        | female     | 75         | 5.98%                            | -                                        | Infected     |
| 299        | female     | 80         | 5.49%                            | -                                        | Infected     |
| 300        | female     | 52         | 96.89%                           | +                                        |              |
| 301        | female     | 44         | 96.21%                           | +                                        |              |
| 302        | female     | 67         | 6.82%                            | -                                        | Infected     |
| 303        | male       | 56         | 95.41%                           | +                                        |              |
| 304        | female     | 73         | 96.41%                           | +                                        |              |
| 305        | male       | 26         | 96.35%                           | +                                        |              |
| 306        | male       | 36         | 95.04%                           | +                                        |              |
| 307        | female     | 64         | 95.72%                           | +                                        |              |
| 308        | female     | 67         | 96.16%                           | +                                        |              |

| <b>NO.</b> | <b>Sex</b> | <b>Age</b> | <b>ELISA inhibition rate (%)</b> | <b>Test results of reagent kit (+/-)</b> | <b>Notes</b> |
|------------|------------|------------|----------------------------------|------------------------------------------|--------------|
| 309        | male       | 54         | 59.37%                           | -                                        | Infected     |
| 310        | male       | 33         | 97.10%                           | +                                        |              |
| 311        | female     | 60         | 96.55%                           | +                                        |              |
| 312        | male       | 61         | 82.79%                           | +                                        |              |
| 313        | male       | 51         | 97.05%                           | +                                        |              |
| 314        | male       | 71         | 44.26%                           | -                                        | Infected     |
| 315        | female     | 52         | 96.30%                           | +                                        |              |
| 316        | male       | 55         | 94.27%                           | +                                        |              |
| 317        | male       | 67         | 92.38%                           | +                                        |              |
| 319        | male       | 72         | 96.52%                           | +                                        |              |
| 320        | female     | 57         | 95.70%                           | +                                        |              |
| 321        | male       | 70         | 96.85%                           | +                                        |              |
| 322        | male       | 58         | 96.72%                           | +                                        |              |
| 323        | male       | 47         | 96.69%                           | +                                        |              |
| 324        | male       | 83         | 19.03%                           | -                                        | Infected     |
| 325        | male       | 37         | 97.02%                           | +                                        |              |
| 326        | male       | 54         | 95.65%                           | +                                        |              |
| 327        | female     | 28         | 96.65%                           | +                                        |              |
| 328        | male       | 40         | 96.45%                           | +                                        |              |
| 329        | male       | 33         | 96.19%                           | +                                        |              |
| 330        | male       | 42         | 96.61%                           | +                                        |              |
| 331        | female     | 92         | 0.81%                            | -                                        | Infected     |
| 332        | male       | 54         | 79.86%                           | +                                        |              |
| 333        | female     | 54         | 96.38%                           | +                                        |              |
| 334        | female     | 46         | 96.04%                           | +                                        |              |
| 335        | female     | 78         | 96.82%                           | +                                        |              |
| 336        | male       | 56         | 96.40%                           | +                                        |              |
| 337        | male       | 77         | 57.57%                           | -                                        | Infected     |
| 338        | female     | 38         | 96.66%                           | +                                        |              |
| 339        | female     | 58         | 94.77%                           | +                                        |              |

| <b>NO.</b> | <b>Sex</b> | <b>Age</b> | <b>ELISA inhibition rate (%)</b> | <b>Test results of reagent kit (+/-)</b> | <b>Notes</b> |
|------------|------------|------------|----------------------------------|------------------------------------------|--------------|
| 340        | female     | 73         | 25.39%                           | +                                        |              |
| 341        | male       | 44         | 77.86%                           | +                                        |              |
| 342        | male       | 33         | 96.65%                           | +                                        |              |
| 343        | female     | 72         | 96.06%                           | +                                        |              |
| 344        | male       | 36         | 96.87%                           | +                                        |              |
| 345        | male       | 19         | 96.65%                           | +                                        |              |
| 346        | female     | 56         | 96.78%                           | +                                        |              |
| 347        | male       | 46         | 96.94%                           | +                                        |              |
| 348        | female     | 29         | 96.27%                           | +                                        |              |
| 349        | male       | 36         | 96.96%                           | +                                        |              |
| 350        | female     | 77         | 5.72%                            | -                                        | Infected     |
| 351        | female     | 49         | 96.34%                           | +                                        |              |
| 352        | male       | 51         | 96.28%                           | +                                        |              |
| 353        | male       | 30         | 81.05%                           | +                                        |              |
| 354        | male       | 55         | 95.75%                           | +                                        |              |
| 355        | male       | 83         | 7.49%                            | -                                        | Uninfected   |
| 356        | male       | 24         | 96.91%                           | +                                        |              |
| 357        | female     | 22         | 96.70%                           | +                                        |              |
| 358        | female     | 74         | 95.34%                           | +                                        |              |
| 359        | male       | 73         | 96.45%                           | +                                        |              |
| 360        | male       | 46         | 96.35%                           | +                                        |              |
| 361        | male       | 71         | 95.33%                           | +                                        |              |
| 362        | male       | 34         | 96.67%                           | +                                        |              |
| 363        | female     | 41         | 93.67%                           | +                                        |              |
| 364        | male       | 23         | 40.70%                           | +                                        |              |
| 365        | female     | 23         | 95.50%                           | +                                        |              |
| 366        | female     | 54         | 96.49%                           | +                                        |              |

## 11.2 Detection results of infected samples by naked eye

The detection results of infected samples from the first affiliated hospital of Henan university are shown in Figure 9-20 and Table 6. The 356 samples included 15 cases under 20 years old, 77 cases between 20 and 39 years old, 132 cases between 40 and 59 years old, 110 cases between 60 and 79 years old and 22 cases over 80 years old. The detection results of contributors by this kit are shown in Figure 23-29.

Detection results of infected samples (from 1 to 56) by naked eye are shown in Figure 23.

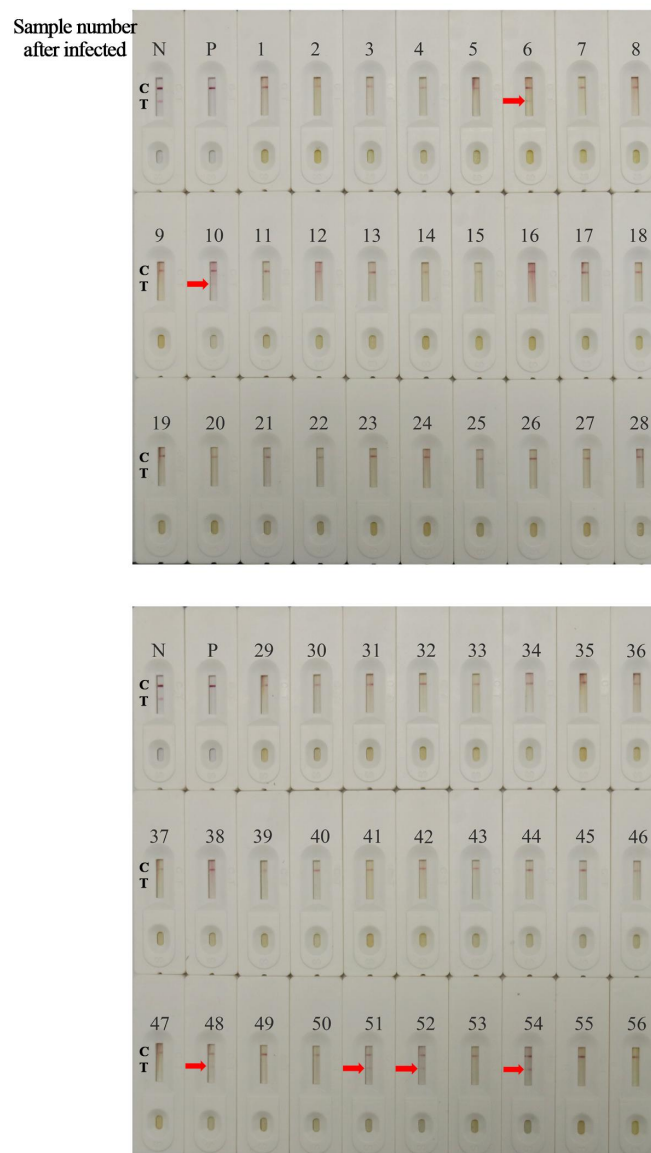

**Figure 23 Detection result by naked eye of infected samples (from 1 to 56).**

**N: negative control; P: positive control; C: control line; T: test line; Red arrow: Indicates a negative result.**



Detection results of infected samples (from 57 to 112) by naked eye are shown in Figure 24.

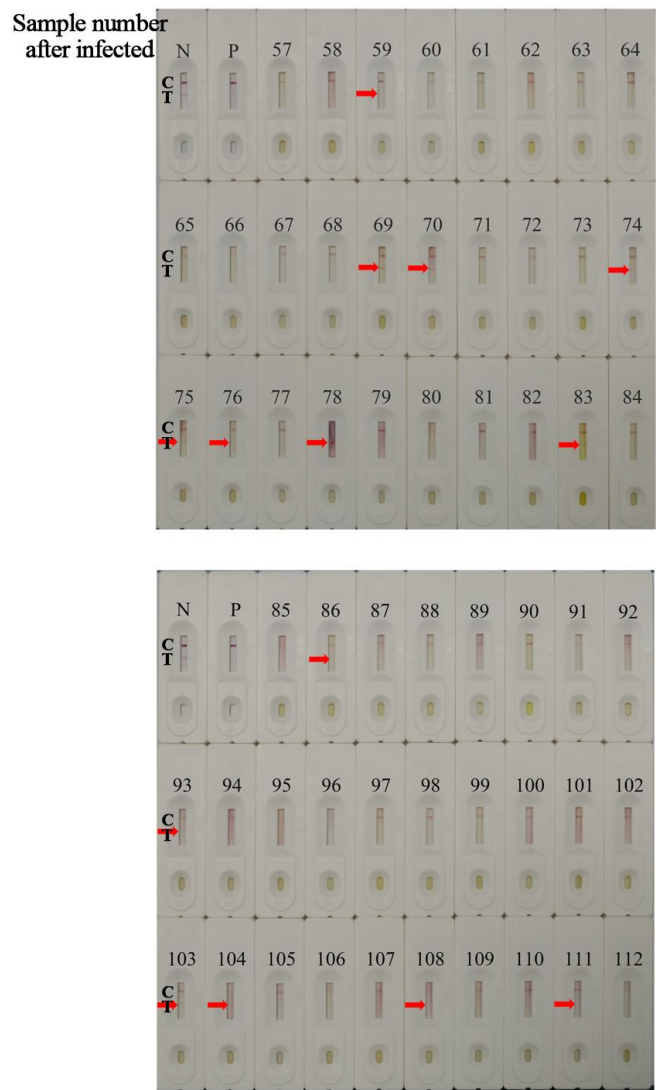

Figure 24 Detection result by naked eye of infected samples (from 57 to 112).

N: negative control; P: positive control; C: control line; T: test line; Red arrow: Indicates a negative result.



Detection results of infected samples (from 159 to 214) by naked eye are shown in Figure 26.

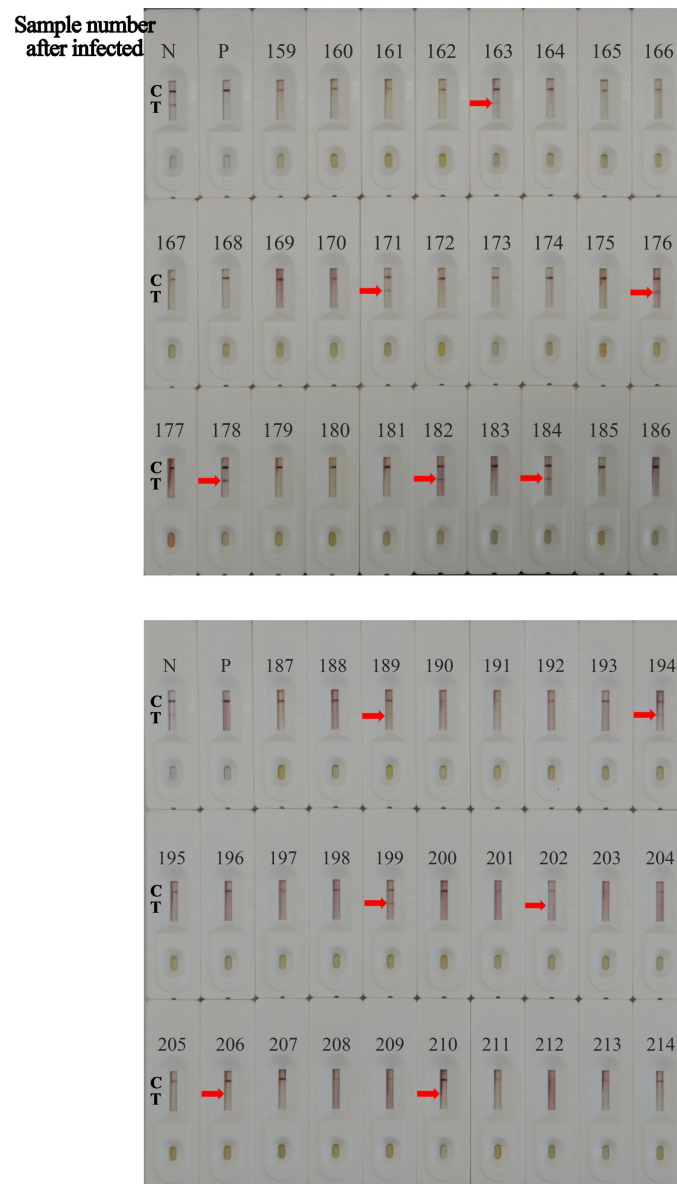

**Figure 26 Detection result by naked eye of infected samples (from 159 to 214).  
N: negative control; P: positive control; C: control line; T: test line; Red arrow: Indicates a negative result.**

Detection results of infected samples (from 215 to 270) by naked eye are shown in Figure 27.

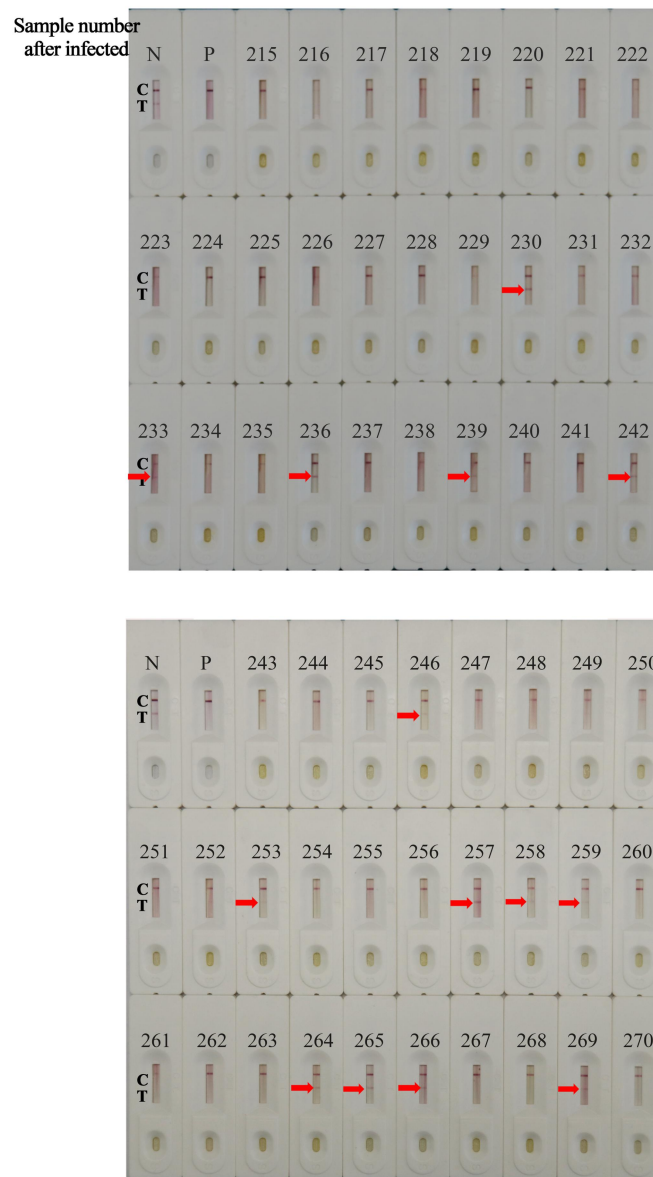

**Figure 27** Detection result by naked eye of infected samples (from 215 to 270).  
**N:** negative control; **P:** positive control; **C:** control line; **T:** test line; **Red arrow:** Indicates a negative result.

Detection results of infected samples (from 271 to 326) by naked eye are shown in Figure 28.

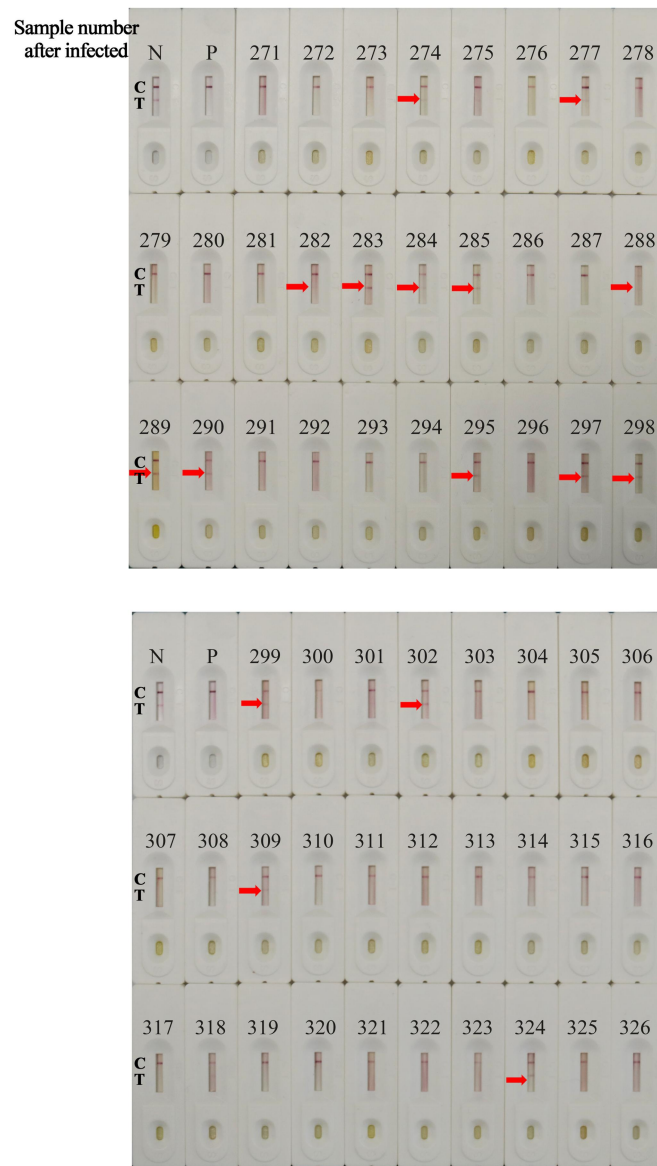

**Figure 28** Detection result by naked eye of infected samples (from 271 to 326).  
**N:** negative control; **P:** positive control; **C:** control line; **T:** test line; **Red arrow:** Indicates a negative result.

Detection results of infected samples (from 327 to 382) by naked eye are shown in Figure 29.

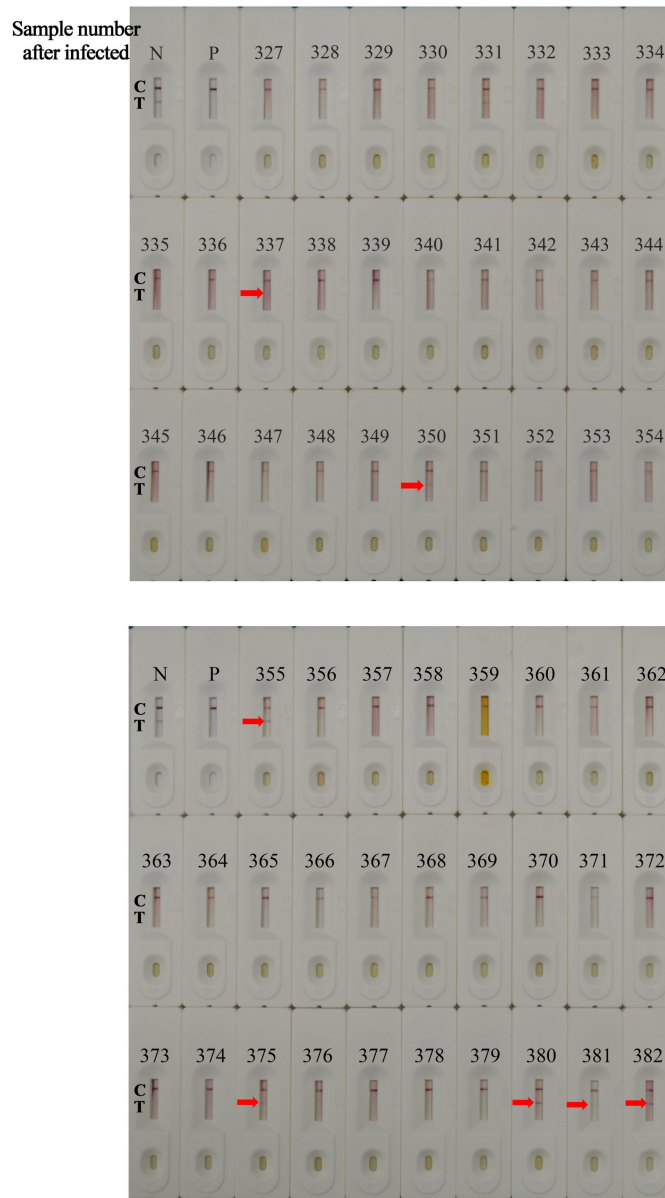

Figure 29 Detection result by naked eye of infected samples (from 327 to 382).

N: negative control; P: positive control; C: control line; T: test line; Red arrow: Indicates a negative result.

### 11.3 Detection results of infected samples by Image J and Graphpad Prism

Detection results of infected samples (from 1 to 112) by Image J and Graphpad Prism are shown in Figure 30.

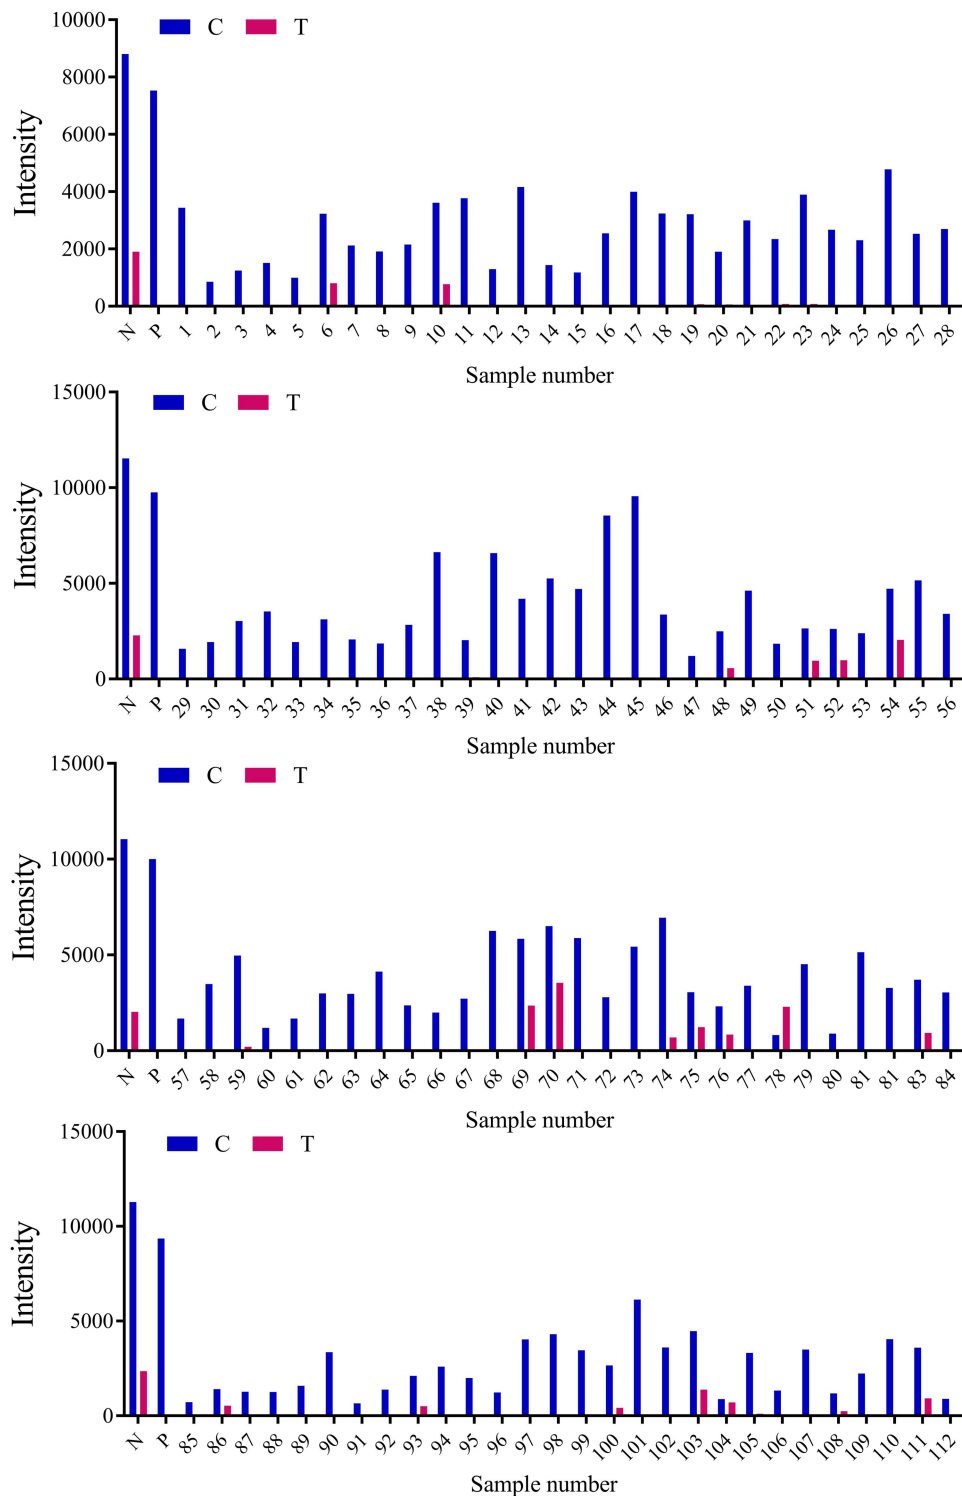

**Figure 30** Detection result by Image J and Graphpad Prism of pre-immunization samples from 1-112.

**N:** negative control; **P:** positive control; **C:** control line; **T:** test line.

Detection results of infected samples (from 113-214) by Image J and Graphpad Prism are shown in Figure 31.

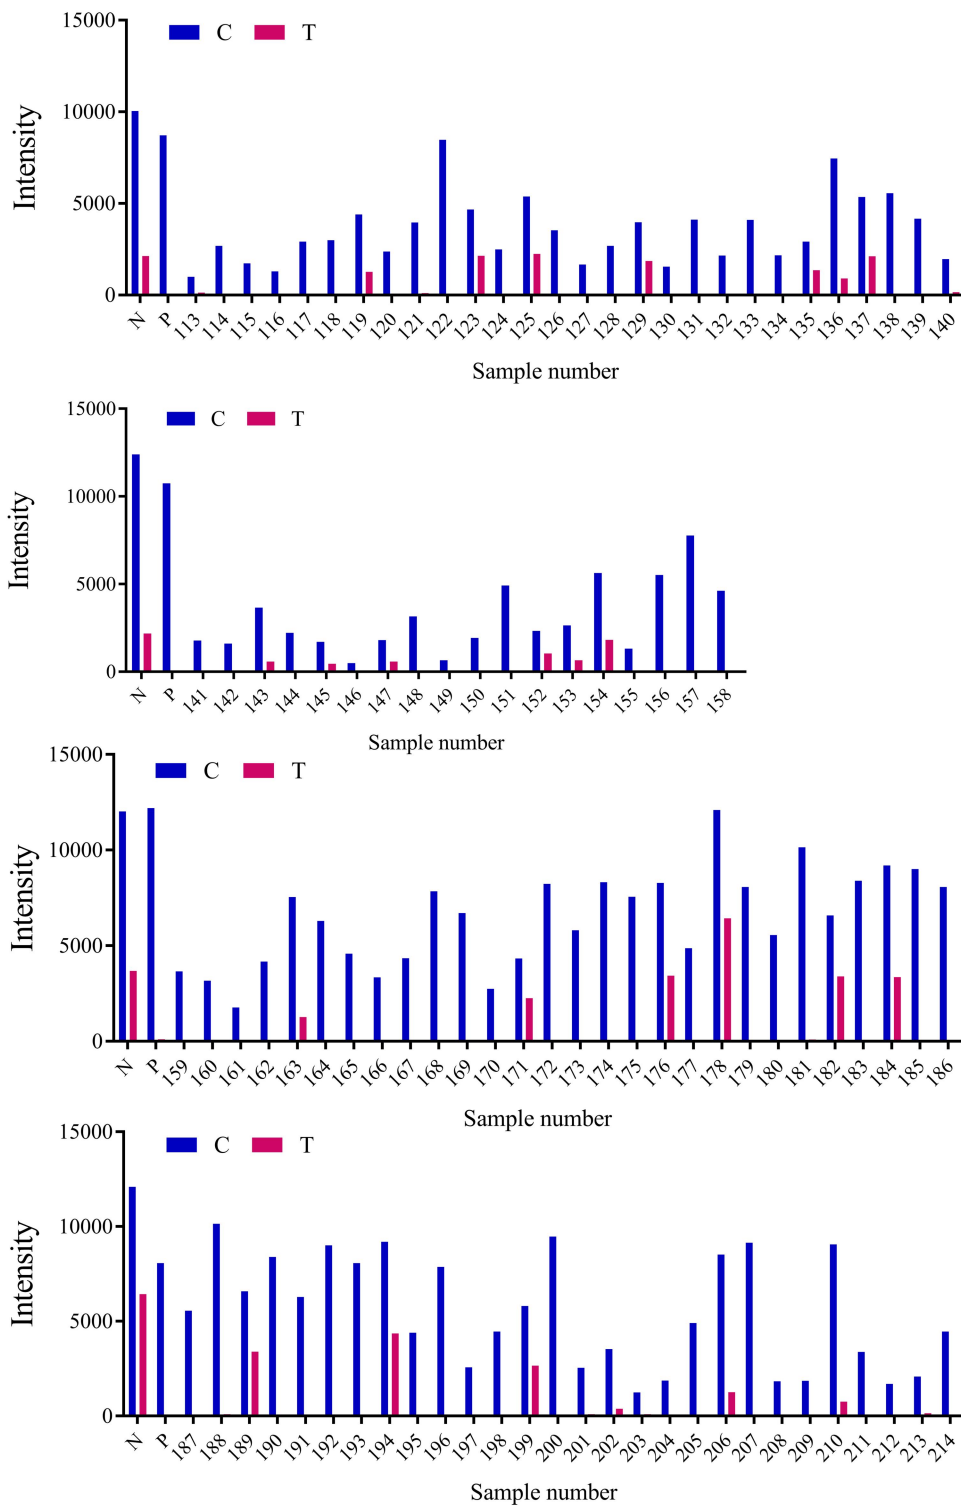

**Figure 31** Detection result by Image J and Graphpad Prism of pre-immunization samples from 113-214.

**N:** negative control; **P:** positive control; **C:** control line; **T:** test line.



Detection results of infected samples (from 215-326) by Image J and Graphpad Prism are shown in Figure 32.

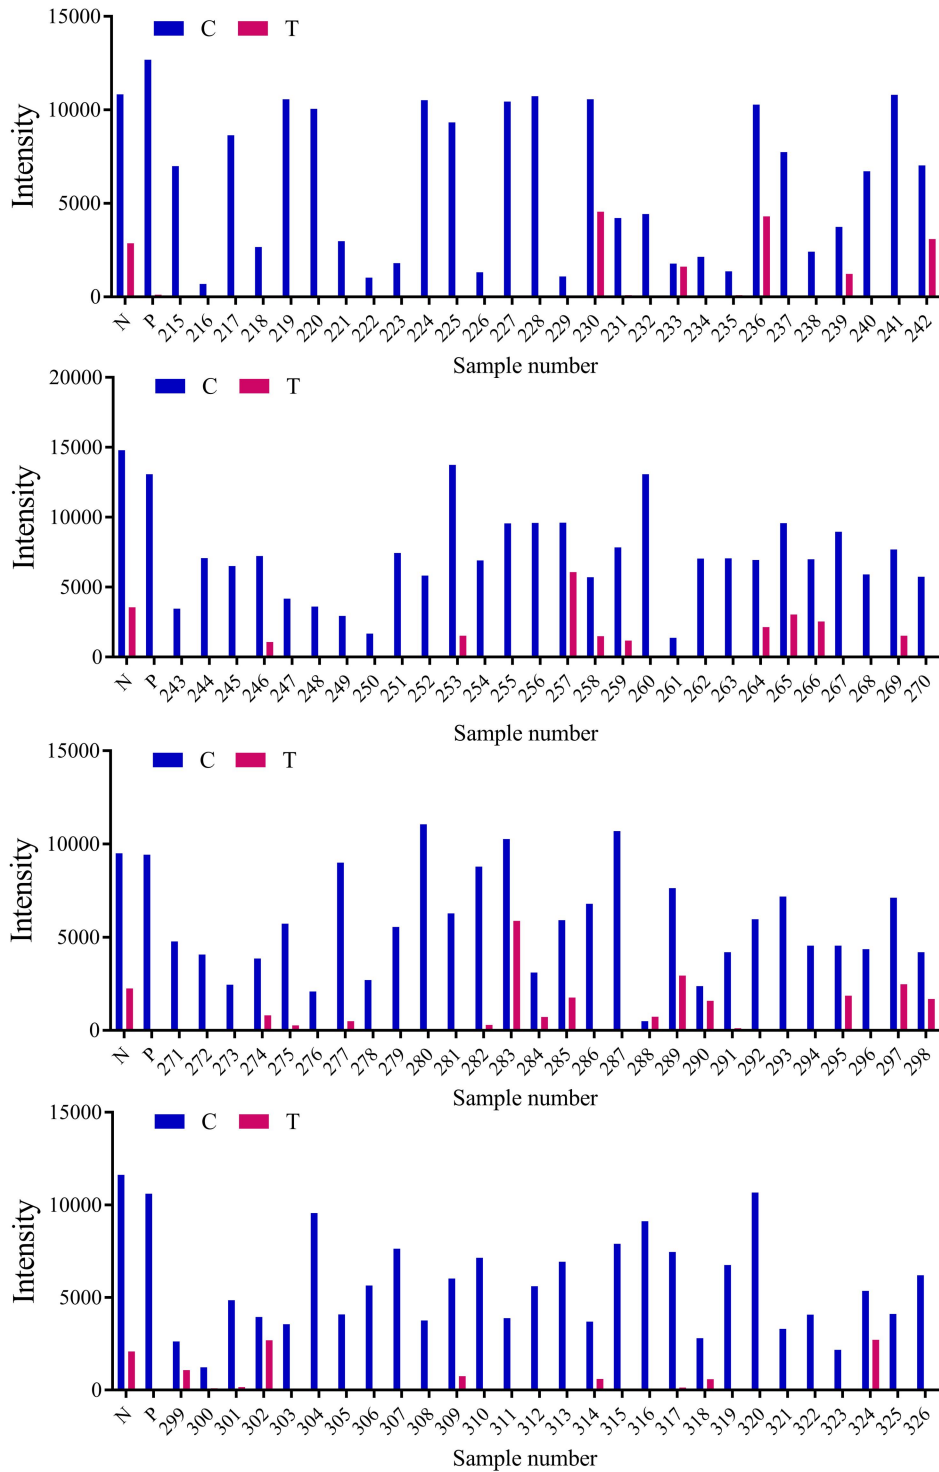

**Figure 32** Detection result by Image J and Graphpad Prism of pre-immunization samples from 215-326.

**N:** negative control; **P:** positive control; **C:** control line; **T:** test line.

Detection results of infected samples (from 327-382) by Image J and Graphpad Prism are shown in Figure 33.

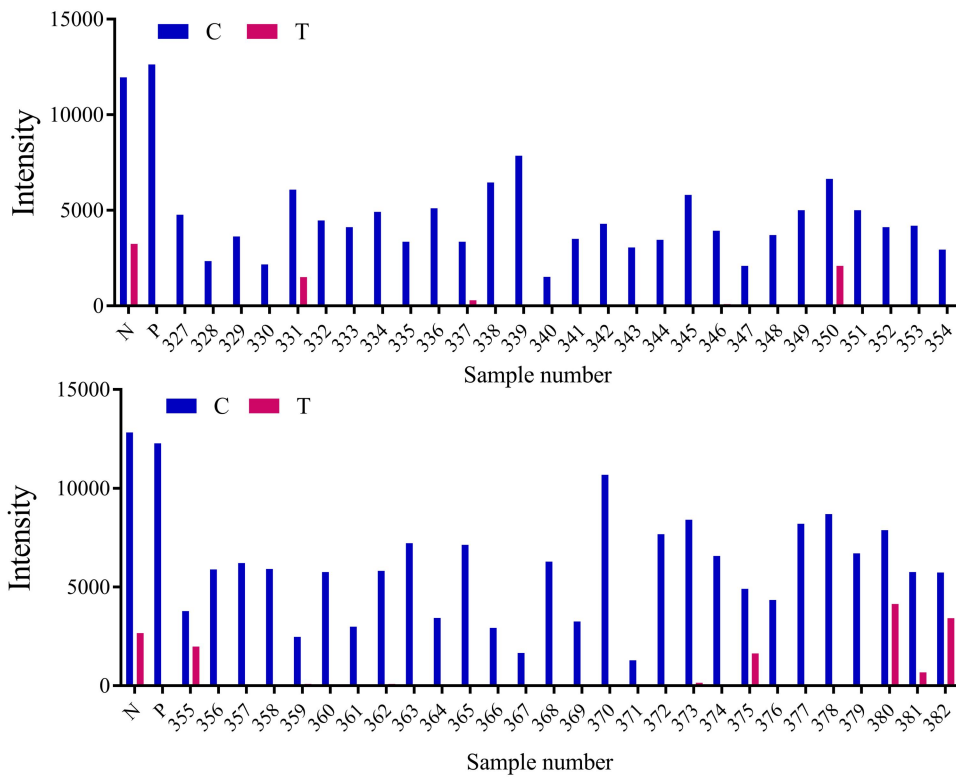

**Figure 33 Detection result by Image J and Graphpad Prism of pre-immunization samples from 327-382.**

**N: negative control; P: positive control; C: control line; T: test line.**

---

## 11.4 Distribution of detection results by ELISA and this research kit

All of the clinical samples after infection were detected by ELISA and this research kit, the distribution of two methods was shown in Figure 34. The detect results of 339 samples are consistent by ELISA (Vazyme Biotech Co. Ltd., DD3101) and this research kit, the coincidence rate was 97.83% (339/356).

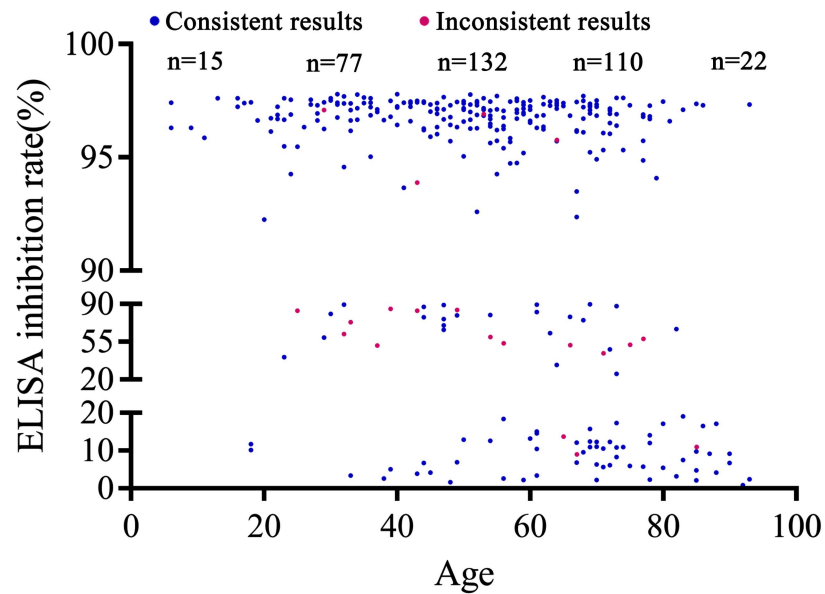

Figure 34 Distribution of 356 samples detection results by ELISA and this research kit.
